# Supplementary material for: A phenothiazine-based colorimetric chemodosimeter for the rapid detection of cyanide anions in organic and aqueous media
Source: Royal Society of Chemistry journal article supplement (doi:10.1039/c4ra06440b), 2014-08-11
Supplement: c4ra06440b1.pdf [file c4ra06440b1.pdf]

## Supporting information for publication

# “A phenothiazine-based colorimetric chemodosimeter for the rapid detection of cyanide anion in organic and aqueous media”

Bhaskar Garg,<sup>†</sup> Linyin Yan,<sup>‡</sup> Tanuja Bisht,<sup>§</sup> Chaoyuan Zhu<sup>‡</sup> and Yong-Chien Ling<sup>†\*</sup>

<sup>†</sup> Department of Chemistry, National Tsing Hua University, 101, Section 2, Kuang-Fu Road, Hsinchu, 30013, Taiwan

<sup>‡</sup> Department of Applied Chemistry, National Chiao Tung University, 1001 Ta Hsueh Road, Hsinchu 30010, Taiwan

<sup>§</sup> Department of Chemistry, Government Degree College, Champawat, 262523, Uttarakhand, India

[ycling@mx.nthu.edu.tw](mailto:ycling@mx.nthu.edu.tw)

### Table of Contents:

|                                                                                                                  |         |
|------------------------------------------------------------------------------------------------------------------|---------|
| General                                                                                                          | S2      |
| Synthetic experimental and characterization data                                                                 | S2-S4   |
| Copies of <sup>1</sup> H and <sup>13</sup> C NMR spectra of compounds                                            | S5-S10  |
| Naked eye detection of <b>4</b> in DCM with different anions                                                     | S11     |
| UV-vis spectral changes of <b>4</b> in the presence of different anions                                          | S11     |
| Absorption spectroscopic titrations of <b>4</b> in DCM with different anions                                     | S12-S14 |
| Quantum chemical calculations and other relevant data for <b>PCP 1</b>                                           | S15-S20 |
| High resolution ESI-MS spectrum of <b>PCP 1</b> -CN <sup>-</sup> adduct                                          | S21     |
| Absorption spectroscopic titrations and profile of <b>PCP 1</b> with different anions                            | S22-S24 |
| <sup>1</sup> H NMR titration of <b>PCP 1</b> with F <sup>-</sup>                                                 | S25     |
| Time dependent absorption spectral and intensity changes of <b>PCP 1</b> with F <sup>-</sup> and CN <sup>-</sup> | S26     |
| Naked eye detection of <b>PCP 1</b> in TritonX-100-water solution with NaF                                       | S27     |
| Absorbance changes of <b>PCP1</b> in micellar solution versus CN <sup>-</sup> concentration                      | S27     |
| References                                                                                                       | S28     |

## Supporting information for publication

### General

Phenothiazine (PTZ), hexadecyltrimethylammonium bromide or Cetrimonium bromide (CTAB), *n*-butyl bromide, tetracyanoethylene (TCE) and triton X-100 were purchased from Alfa Aesar, UK. All other chemicals and reagents received were of highest purity and used without further purification. Fisher Scientific FS60 ultrasonic bath cleaner (150 W) was used for performing sonication. The Fourier transform infrared spectroscopy (FTIR) was carried out on a Perkin-Elmer system 2000. The <sup>1</sup>H NMR and <sup>13</sup>C NMR were recorded on a nuclear magnetic resonance spectrometer (Bruker Cryomagnet, Oxford) operated under 600 MHz (<sup>1</sup>H) and 150 MHz (<sup>13</sup>C), respectively at room temperature. The chemical shifts (δ ppm) are referenced to the respective solvents and splitting patterns are designed as s (singlet), d (doublet), t (triplet), m (multiplet), dd (doublet of doublets), td (triplet of doublets) and bs (broad singlet). The UV-vis absorption spectroscopy was carried out using a JASCO V-570 instrument and the absorption maxima are expressed in nanometers (nm). The high resolution electrospray ionization mass spectrometric analyses were carried out in a Finnigan MAT 95 XP spectrometer. The column chromatography was carried out using silica gel (100-200 mesh). The TLC analysis was carried out on double coated silica Merk plates. The solvents used were of analytical grade and used without further purification unless otherwise mentioned.

### Synthetic experimental:

#### *Synthesis of 10-Butyl-10H-phenothiazine (2)*

*n*C<sub>4</sub>H<sub>9</sub>Br (4.1 g, 30 mmol) was added to a stirred solution of phenothiazine (4.97 g, 25 mmol), hexadecyltrimethylammonium bromide (365 mg, 1 mmol), and NaOH (1.5 g, 37.5 mmol) in acetone (40 mL). The reaction mixture was heated to reflux for 12 h under nitrogen atmosphere. After completion of the reaction, the mixture was cooled to room temperature and the solvent was evaporated under reduced pressure. The residue was washed with water and extracted with dichloromethane (3 × 50 mL). The combined organic fractions were dried over anhydrous MgSO<sub>4</sub>. The solvent was removed and the residue was purified by column chromatography using *n*-heptane as an eluent. Yield: 3.315 g (52%) of a light green liquid; <sup>1</sup>H NMR (600 MHz, 25°C, CDCl<sub>3</sub>): δ = 7.22-7.24 (m, 4H, Ar), 7.00 (t, *J*= 7.2 Hz, 2H, Ar), 6.94 (d, *J*= 7.5 Hz, 2H, Ar), 3.92 (t, *J*= 7.1 Hz, 2H, -N-CH<sub>2</sub>), 1.85-1.90 (quin, 2H, -CH<sub>2</sub>), 1.51-1.58 (sex, 2H, -CH<sub>2</sub>) and 1.03 (t, *J*= 7.4 Hz, 3H, -

## Supporting information for publication

CH<sub>3</sub>); <sup>13</sup>C NMR (150 MHz, 25°C, CDCl<sub>3</sub>): δ = 145.2 C, 127.2 CH, 127.0 CH, 124.8 C, 122.1 CH, 115.2 CH, 46.9 N-CH<sub>2</sub>, 28.8 CH<sub>2</sub>, 20.0 CH<sub>2</sub> and 13.7 CH<sub>3</sub>.

### *Synthesis of 10-Butyl-3-tricyanovinyl-10H-phenothiazine (PCP 1)*

10-Butyl-10H-phenothiazine **2** (0.766 g, 3 mmol) was dissolved in anhydrous DMF-THF (10 mL, 1:1, v/v) and resulting mixture was stirred at room temperature. To this stirred solution, TCNE (0.384 g, 3 mmol) was added and heated to reflux for 6 h under nitrogen atmosphere. After completion of the reaction, the mixture was cooled to room temperature and the solvent was evaporated under reduced pressure. The residue was washed with cold water and extracted with dichloromethane (2 × 50 mL). The combined organic fractions were dried over anhydrous MgSO<sub>4</sub>. The solvent was evaporated and crude was purified by column chromatography (dichloromethane: *n*-hexane; 1:1 v/v). **PCP 1** was obtained as blue amorphous powder. Yield: 0.437 g (41%); IR (KBr, cm<sup>-1</sup>): 2215 (CN), 1595, 1571, 1494, 1463, 1404, 1342, 1279, 1188; UV-vis (DCM, λ<sub>max</sub>/nm): 330, 405 and 600; <sup>1</sup>H NMR (600 MHz, 25°C, (CD<sub>3</sub>)<sub>2</sub>SO): δ = 7.80 (d, *J* = 8.4 Hz, 1H, Ar), 7.66 (bs, 1H, Ar), 7.24 (d, *J* = 8.2 Hz, 2H, Ar), 7.14 (t, *J* = 8.8 Hz, 2H, Ar), 7.04 (t, *J* = 7.2 Hz, 1H, Ar), 3.97 (t, *J* = 6.6 Hz, 2H, -N-CH<sub>2</sub>), 1.66-1.68 (m, 2H, -CH<sub>2</sub>), 1.38-1.41 (m, 2H, -CH<sub>2</sub>) and 0.88 (t, *J* = 6.7 Hz, 3H, -CH<sub>3</sub>); <sup>13</sup>C NMR (150 MHz, 25°C, (CD<sub>3</sub>)<sub>2</sub>SO): δ = 150.7 C, 141.2 C, 137.3 C, 131.2 CH, 128.3 CH, 127.3 CH, 126.8 CH, 124.5 CH, 123.3 CN, 122.5 CN, 121.2 CN, 116.9 CH, 115.7 CH, 114.4 C, 113.1 C, 112.8 C, 86.0 C, 47.1 N-CH<sub>2</sub>, 28.1 CH<sub>2</sub>, 19.1 CH<sub>2</sub>, and 13.4 CH<sub>3</sub>; Anal Calc. for C<sub>21</sub>H<sub>16</sub>N<sub>4</sub>S: Calcd C; 70.76, H; 4.52, N; 15.72. Found C; 70.75, H; 4.51, N; 15.70.

### *Synthesis of 3-tricyanovinyl-10H-phenothiazine (4)*

Compound **4** was prepared by modification of known procedure.<sup>1</sup> In brief; TCNE (1.2 g, 9.3 mmol) was added to a stirred solution of phenothiazine (1.86 g, 9.3 mmol) in DMF (10 mL). The reaction mixture was heated at 90°C for 4 h under nitrogen atmosphere. After completion of the reaction, the mixture was cooled to room temperature and poured into crushed ice-water bath. The precipitate was filtered on Buckner funnel and washed repeatedly with water (2 × 100 mL) followed by methanol (50 mL). The as-obtained blue needles were dried under high vacuum for 6 h and stored in a dry box prior to use. Yield: 2.37 g (85%); mp 230 °C; IR (KBr, cm<sup>-1</sup>): 3321 (NH),

## Supporting information for publication

2223 (CN), 1602, 1573, 1503, 1470, 1348, 1286, 1201, 1168; UV-vis (DCM,  $\lambda_{\max}$ /nm): 325, 400 and 600;  $^1\text{H}$  NMR (600 MHz, 25°C,  $(\text{CD}_3)_2\text{SO}$ ):  $\delta$  = 10.06 (s, 1H, N-H), 7.62 (dd,  $J_{1,2} = J_{3,4} = 2.3$  Hz,  $J_{1,3} = 8.7$  Hz, 1H, Ar), 7.49 (d,  $J = 2.0$  Hz, 1H, Ar), 7.01-7.04 (dt, 1H, Ar), 6.93 (dd,  $J_{1,2} = J_{3,4} = 1.4$  Hz,  $J_{1,3} = 7.7$  Hz, 1H, Ar), 6.85-6.88 (dt, 1H, Ar), 6.74 (d,  $J = 8.7$  Hz, 1H, Ar), and 6.72 (dd,  $J_{1,2} = J_{3,4} = 1.2$  Hz,  $J_{1,3} = 7.9$  Hz, 1H, Ar);  $^{13}\text{C}$  NMR (150 MHz, 25°C,  $(\text{CD}_3)_2\text{SO}$ ):  $\delta$  = 147.7 C, 137.0 C, 136.0 C, 132.4 CH, 128.1 CH, 126.2 CH, 125.8 CH, 124.4 CH, 122.1 CN, 117.9 CN, 116.2 CH, 115.7 C, 114.5 CH, 113.7 C, 113.4 C, and 81.9 C; Anal Calc. for  $\text{C}_{17}\text{H}_8\text{N}_4\text{S}$ : Calcd C; 67.98, H; 2.68, N; 18.65. Found C; 67.94, H; 2.66, N; 18.64.

### Supporting information for publication

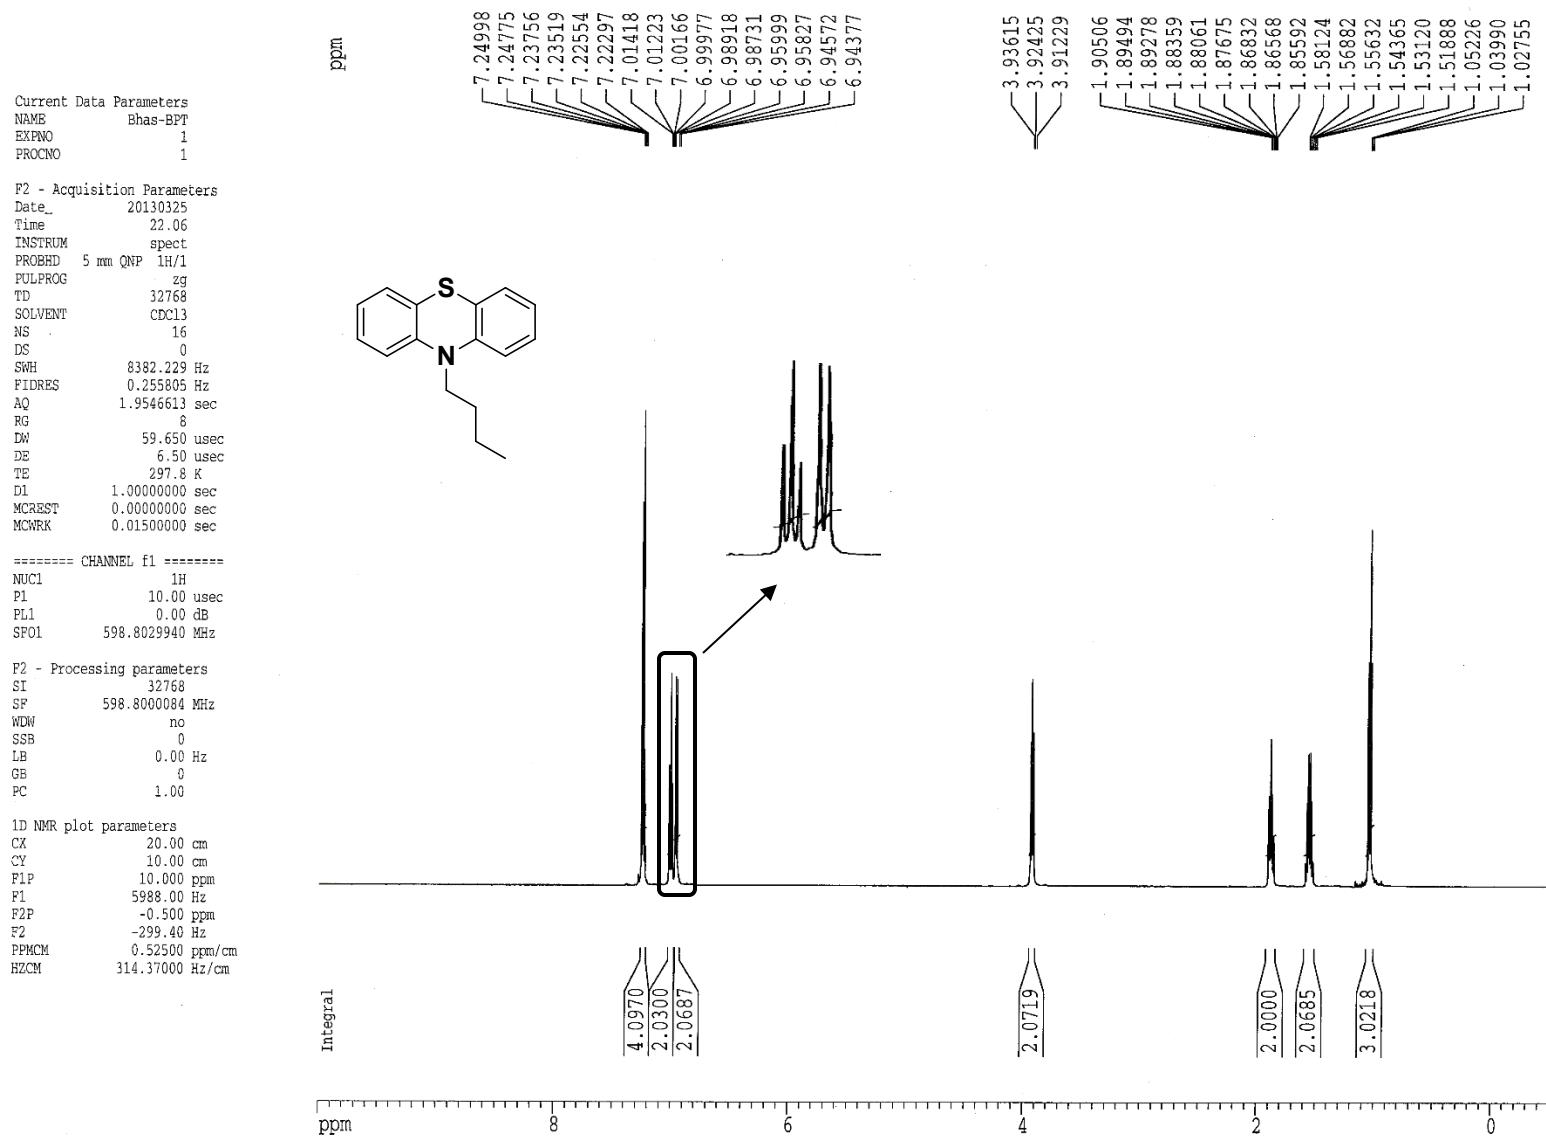

Figure S1 <sup>1</sup>H NMR spectrum of compound 2 in CDCl<sub>3</sub>

# Supporting information for publication

Current Data Parameters  
 NAME Bhas-BPT  
 EXPNO 2  
 PROCNO 1

F2 - Acquisition Parameters  
 Date\_ 20130325  
 Time 22.07  
 INSTRUM spect  
 PROBHD 5 mm QNP 1H/1  
 PULPROG zgpg  
 TD 32768  
 SOLVENT CDCl3  
 NS 14  
 DS 0  
 SWH 45045.047 Hz  
 FIDRES 1.374666 Hz  
 AQ 0.3637748 sec  
 RG 2048  
 DW 11.100 usec  
 DE 6.50 usec  
 TE 298.0 K  
 D1 3.5000000 sec  
 d11 0.0300000 sec  
 DELTA 3.4000010 sec  
 MCREST 0.0000000 sec  
 MCWRK 0.0150000 sec

===== CHANNEL f1 =====  
 NUC1 13C  
 P1 4.80 usec  
 PL1 0.00 dB  
 SFO1 150.5849425 MHz

===== CHANNEL f2 =====  
 CPDPRG2 waltz16  
 NUC2 1H  
 PCPD2 92.00 usec  
 PL2 120.00 dB  
 PL12 9.00 dB  
 PL13 14.00 dB  
 SFO2 598.8029940 MHz

F2 - Processing parameters  
 SI 65536  
 SF 150.5684178 MHz  
 WDW EM  
 SSB 0  
 LB 3.00 Hz  
 GB 0  
 PC 1.00

1D NMR plot parameters  
 CX 20.00 cm  
 CY 4.50 cm  
 F1P 200.000 ppm  
 F1 30113.68 Hz  
 F2P 0.000 ppm  
 F2 0.00 Hz  
 PPMCM 10.00000 ppm/cm  
 HZCM 1505.68420 Hz/cm

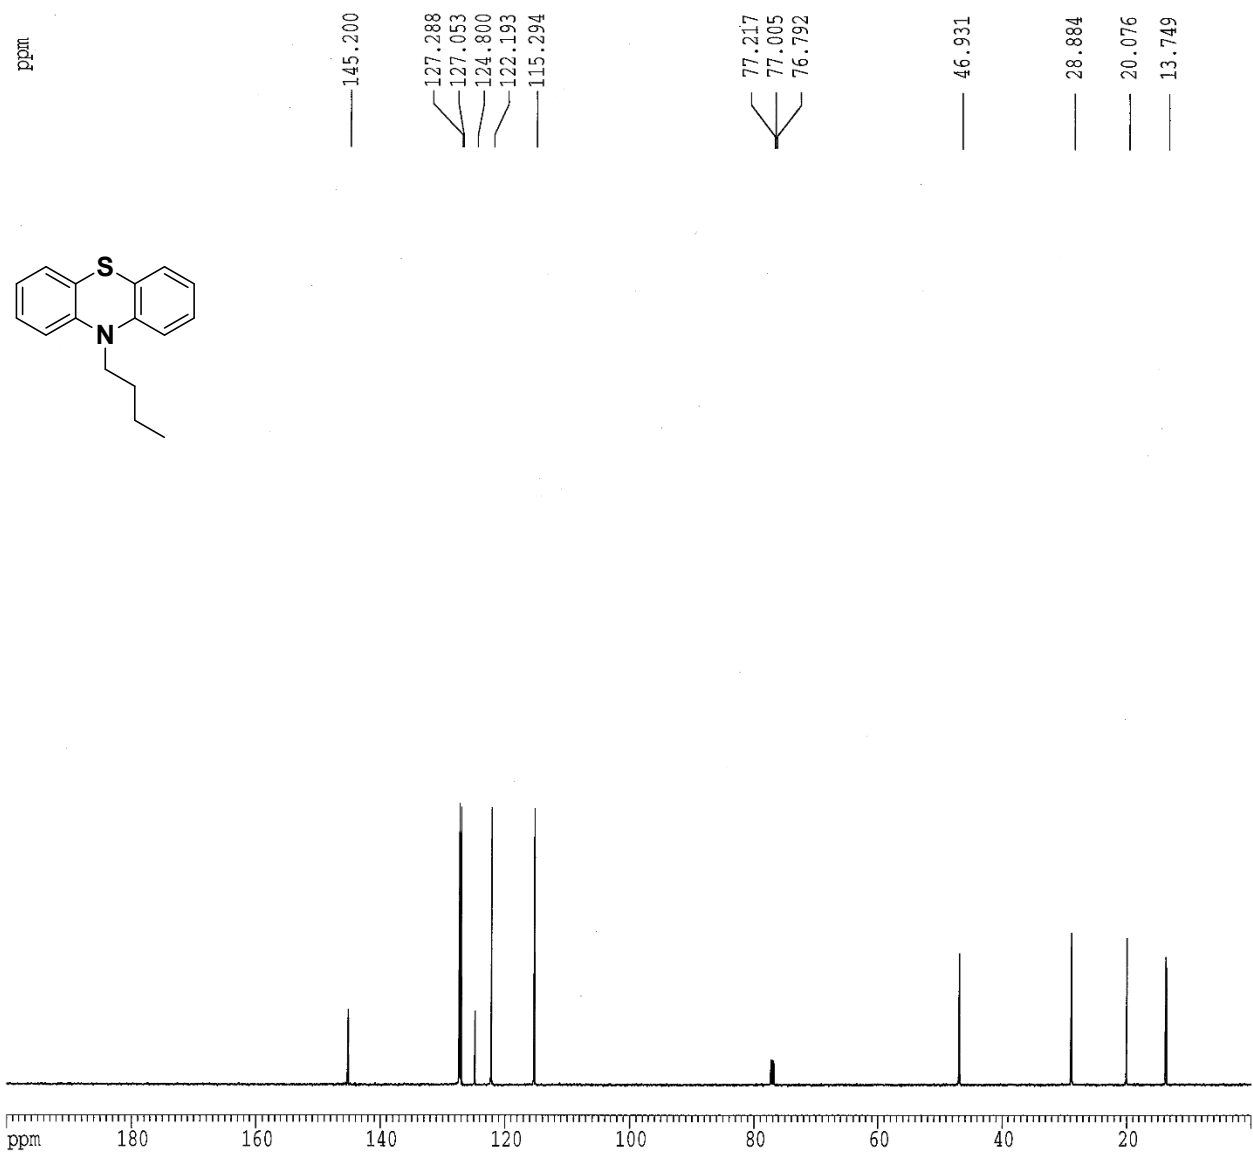

Figure S2 <sup>13</sup>C NMR spectrum of compound 2 in CDCl<sub>3</sub>

### Supporting information for publication

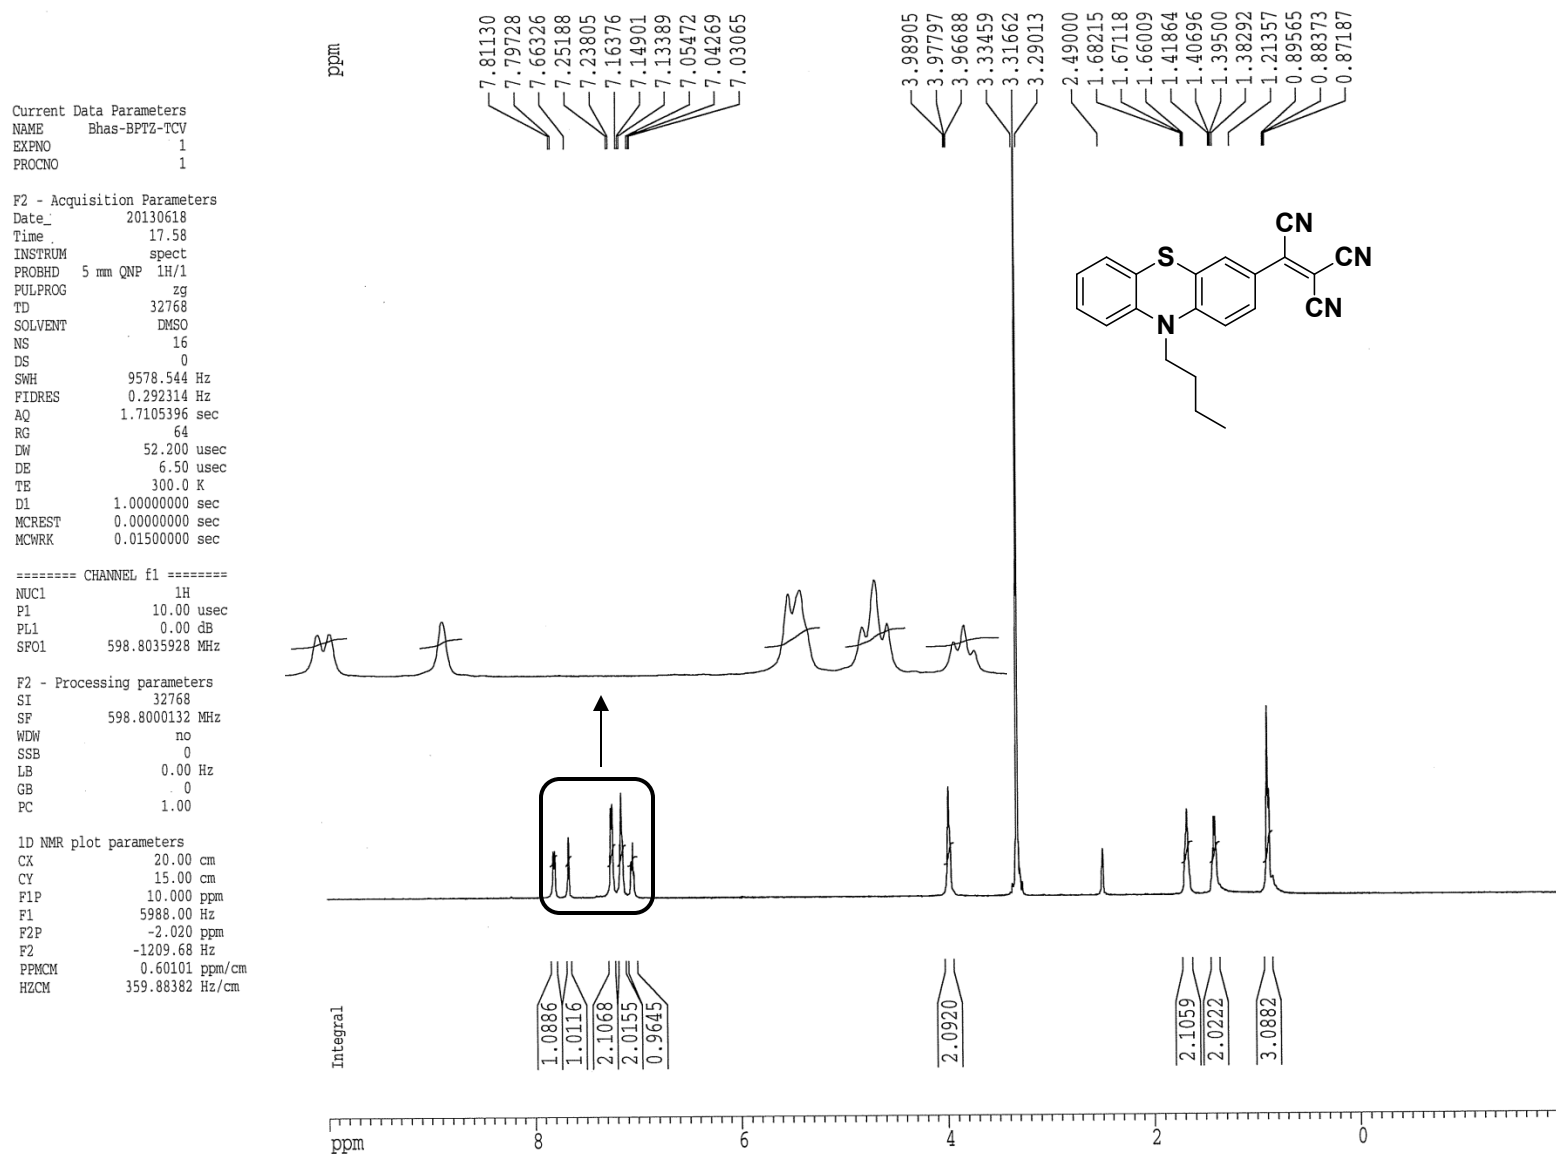

Figure S3 <sup>1</sup>H NMR spectrum of PCP 1 in (CD<sub>3</sub>)<sub>2</sub>SO

# Supporting information for publication

Current Data Parameters  
 NAME Bhas-BPTZ-TCV  
 EXPNO 2  
 PROCNO 1

F2 - Acquisition Parameters  
 Date\_ 20130618  
 Time 18.00  
 INSTRUM spect  
 PROBHD 5 mm QNP 1H/1  
 PULPROG zgpg  
 TD 32768  
 SOLVENT DMSO  
 NS 300  
 DS 0  
 SWH 45045.047 Hz  
 FIDRES 1.374666 Hz  
 AQ 0.3637748 sec  
 RG 2048  
 DW 11.100 usec  
 DE 6.50 usec  
 TE 300.0 K  
 D1 3.50000000 sec  
 d11 0.03000000 sec  
 DELTA 3.40000010 sec  
 MCREST 0.00000000 sec  
 MCVRK 0.01500000 sec

==== CHANNEL f1 =====  
 NUC1 13C  
 P1 4.80 usec  
 PL1 0.00 dB  
 SFO1 150.5849425 MHz

==== CHANNEL f2 =====  
 CPDPRG2 waltz16  
 NUC2 1H  
 PCPD2 92.00 usec  
 PL2 120.00 dB  
 PL12 9.00 dB  
 PL13 14.00 dB  
 SFO2 598.8029940 MHz

F2 - Processing parameters  
 SI 65536  
 SF 150.5684603 MHz  
 WDW EM  
 SSB 0  
 LB 3.00 Hz  
 GB 0  
 PC 1.00

ID NMR plot parameters  
 CX 20.00 cm  
 CY 12.00 cm  
 FIP 200.000 ppm  
 F1 30113.69 Hz  
 F2 0.000 ppm  
 FZ 0.00 Hz  
 PPMCM 10.00000 ppm/cm  
 HZCM 1505.68469 Hz/cm

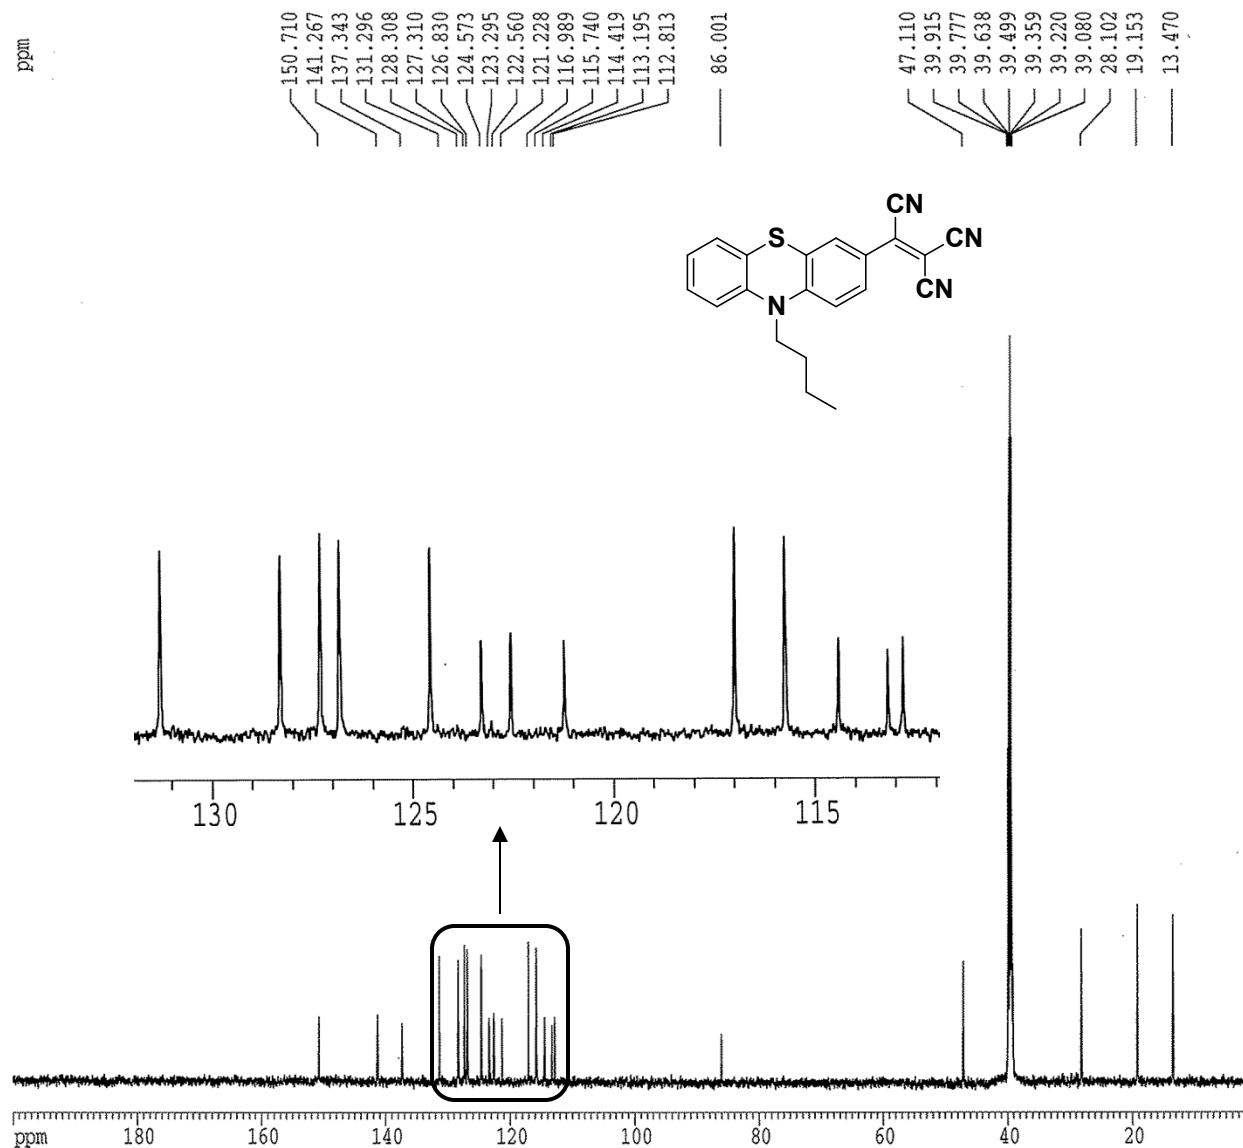

Figure S4 <sup>13</sup>C NMR spectrum of compound PCP 1 in (CD<sub>3</sub>)<sub>2</sub>SO



### Supporting information for publication

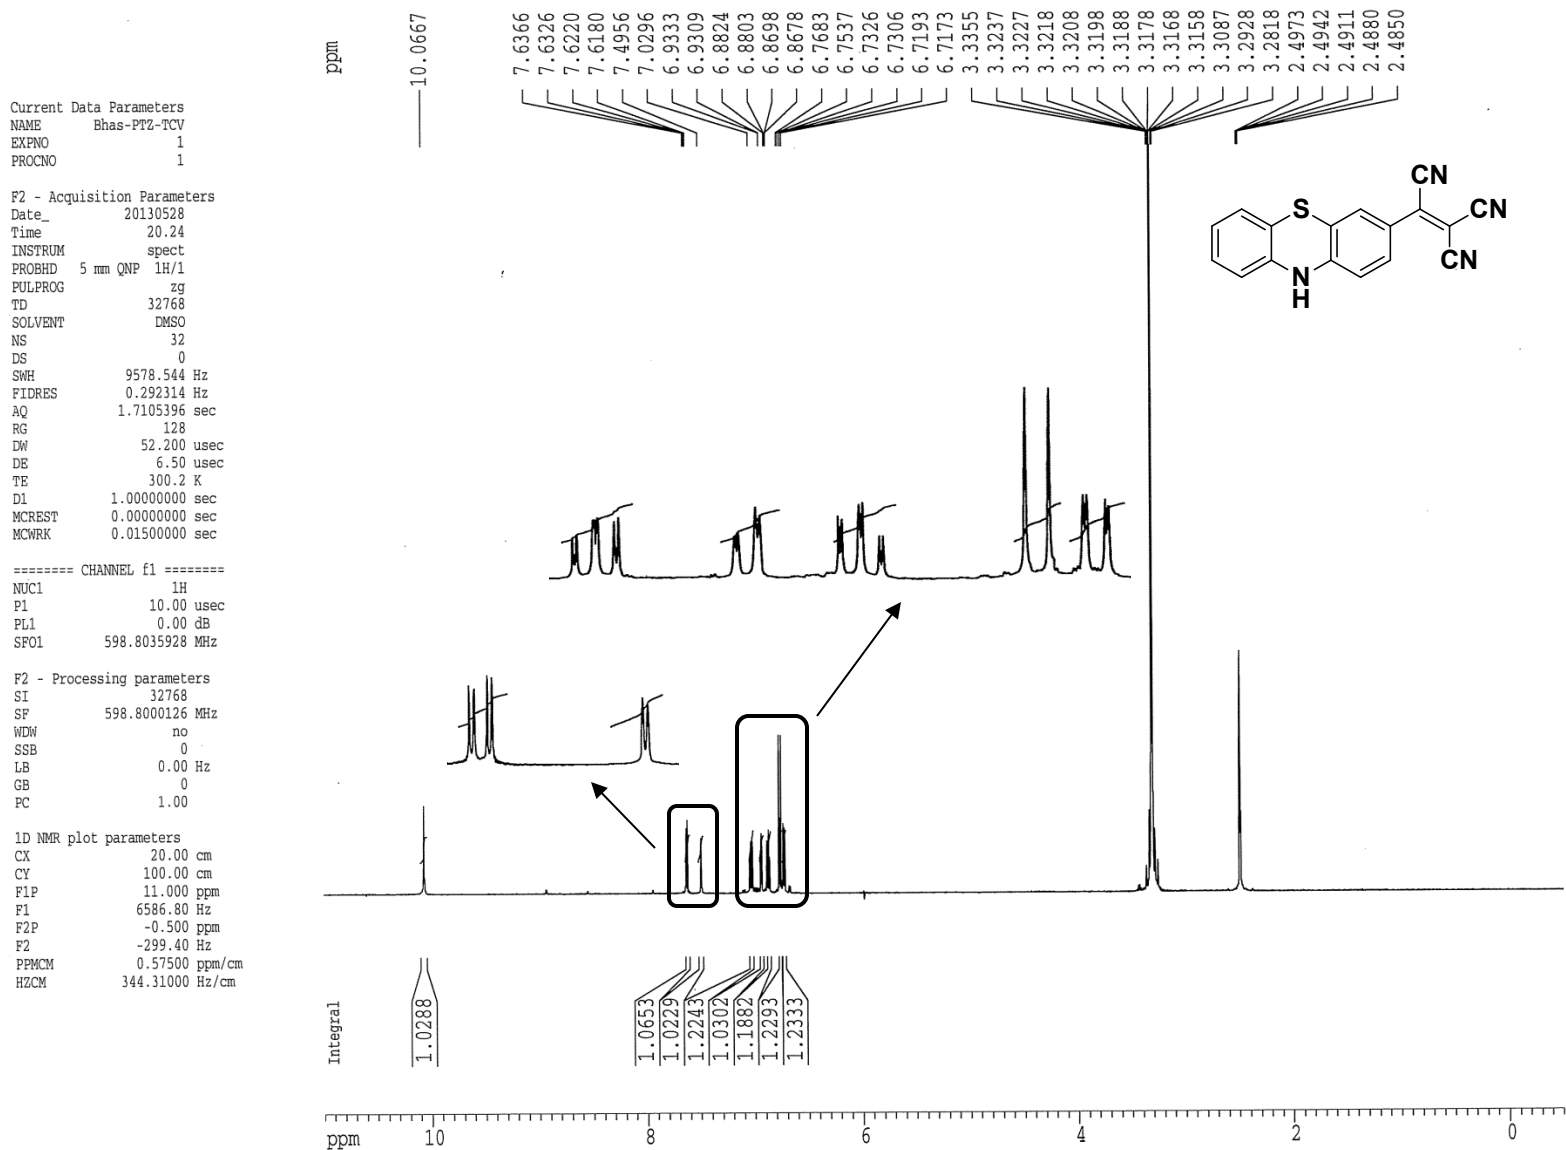

Figure S5. <sup>1</sup>H NMR spectrum of compound 4 in (CD<sub>3</sub>)<sub>2</sub>SO

# Supporting information for publication

```

Current Data Parameters
NAME      Bhas-PTZ-TCV
EXPNO    2
PROCNO   1

F2 - Acquisition Parameters
Date_    20130528
Time     20.27
INSTRUM  spect
PROBHD   5 mm QNP 1H/1
PULPROG  zgpg
TD        32768
SOLVENT  DMSO
NS        1530
DS        0
SWH       45045.047 Hz
FIDRES   1.374666 Hz
AQ        0.3637748 sec
RG        2048
DW        11.100 usec
DE        6.500 usec
TE        300.4 K
D1        3.50000000 sec
d11       0.03000000 sec
DELTA    3.40000010 sec
MCREST   0.00000000 sec
MCWRK    0.01500000 sec

===== CHANNEL f1 =====
NUC1      13C
P1        4.80 usec
PL1       0.00 dB
SFO1     150.5849425 MHz

===== CHANNEL f2 =====
CPDPRG2  waltz16
NUC2      1H
PCPD2    92.00 usec
PL2       120.00 dB
PL12      9.00 dB
PL13      14.00 dB
SFO2     598.8029940 MHz

F2 - Processing parameters
SI        65536
SF        150.5684596 MHz
WDW       EM
SSB       0
LB        3.00 Hz
GB        0
PC        1.00

1D NMR plot parameters
CX        20.00 cm
CY        50.00 cm
F1P       200.000 ppm
F1        30113.69 Hz
F2P       0.000 ppm
F2        0.00 Hz
PPMCM     10.00000 ppm/cm
HZCM      1505.68469 Hz/cm
    
```

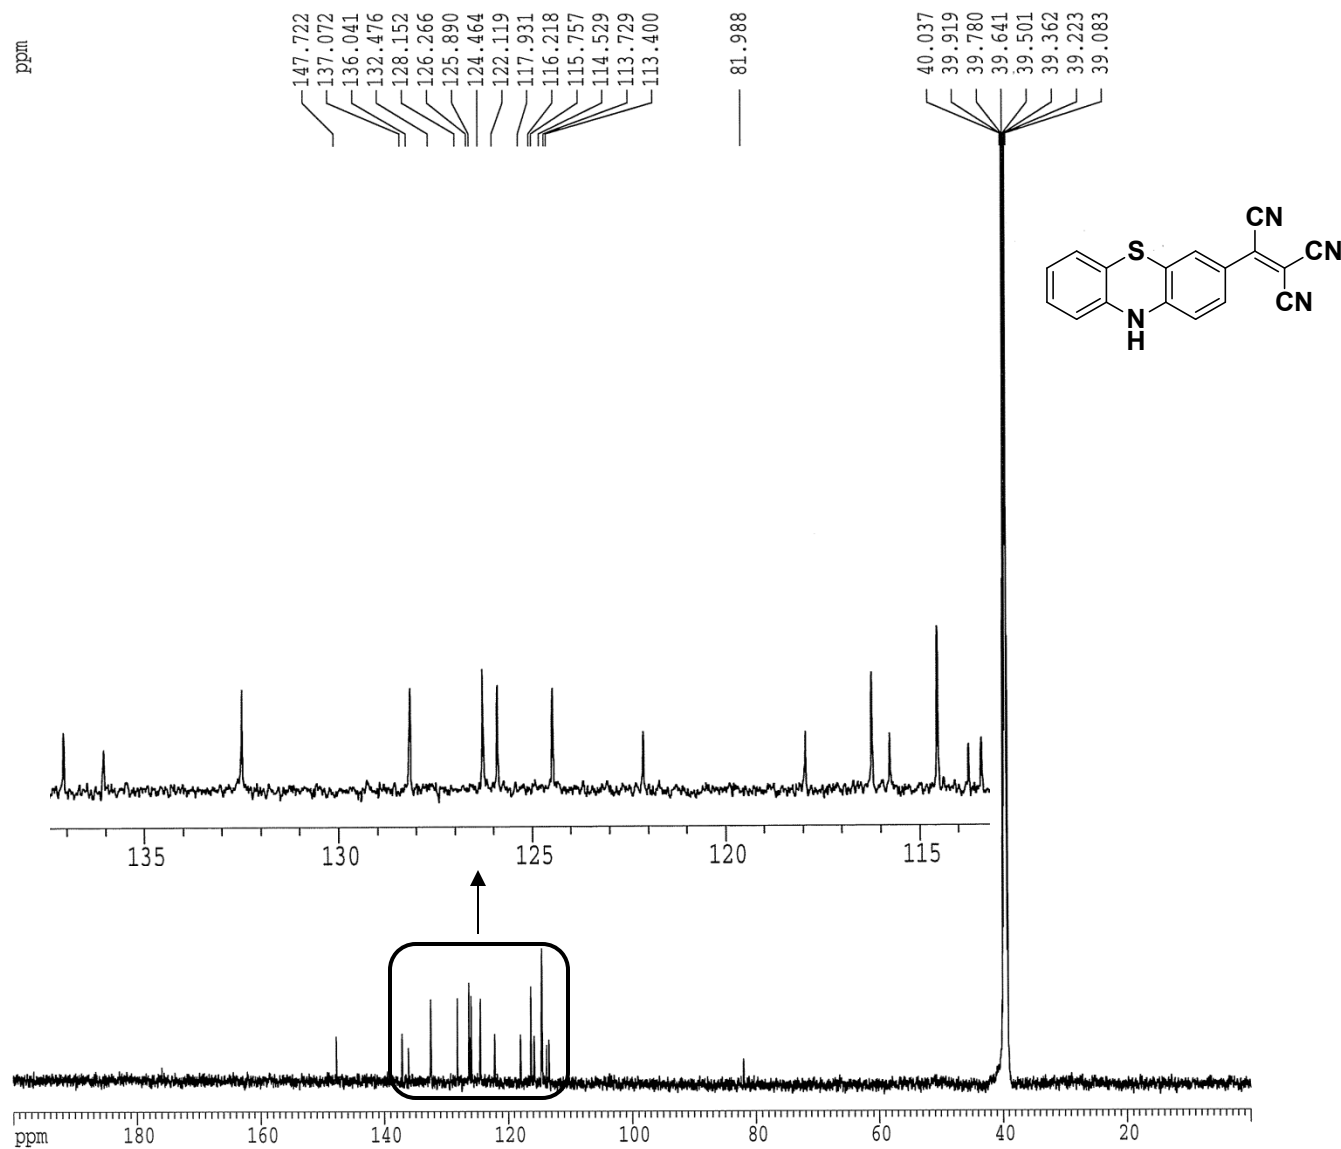

Figure S6.  $^{13}\text{C}$  NMR spectrum of compound 4 in  $(\text{CD}_3)_2\text{SO}$

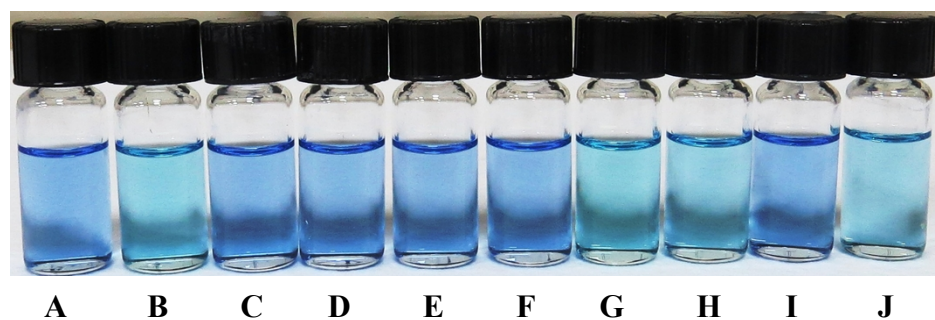

**Figure S7** Color changes of comp **4** ( $5 \times 10^{-5}$  M) in DCM solution upon the addition of different anions ( $5 \times 10^{-4}$  M); **A** = **4**, **B** =  $\text{F}^-$ , **C** =  $\text{Cl}^-$ , **D** =  $\text{Br}^-$ , **E** =  $\text{I}^-$ , **F** =  $\text{NO}_3^-$ , **G** =  $\text{AcO}^-$ , **H** =  $\text{H}_2\text{PO}_4^-$ , **I** =  $\text{HSO}_4^-$ , and **J** =  $\text{CN}^-$ .

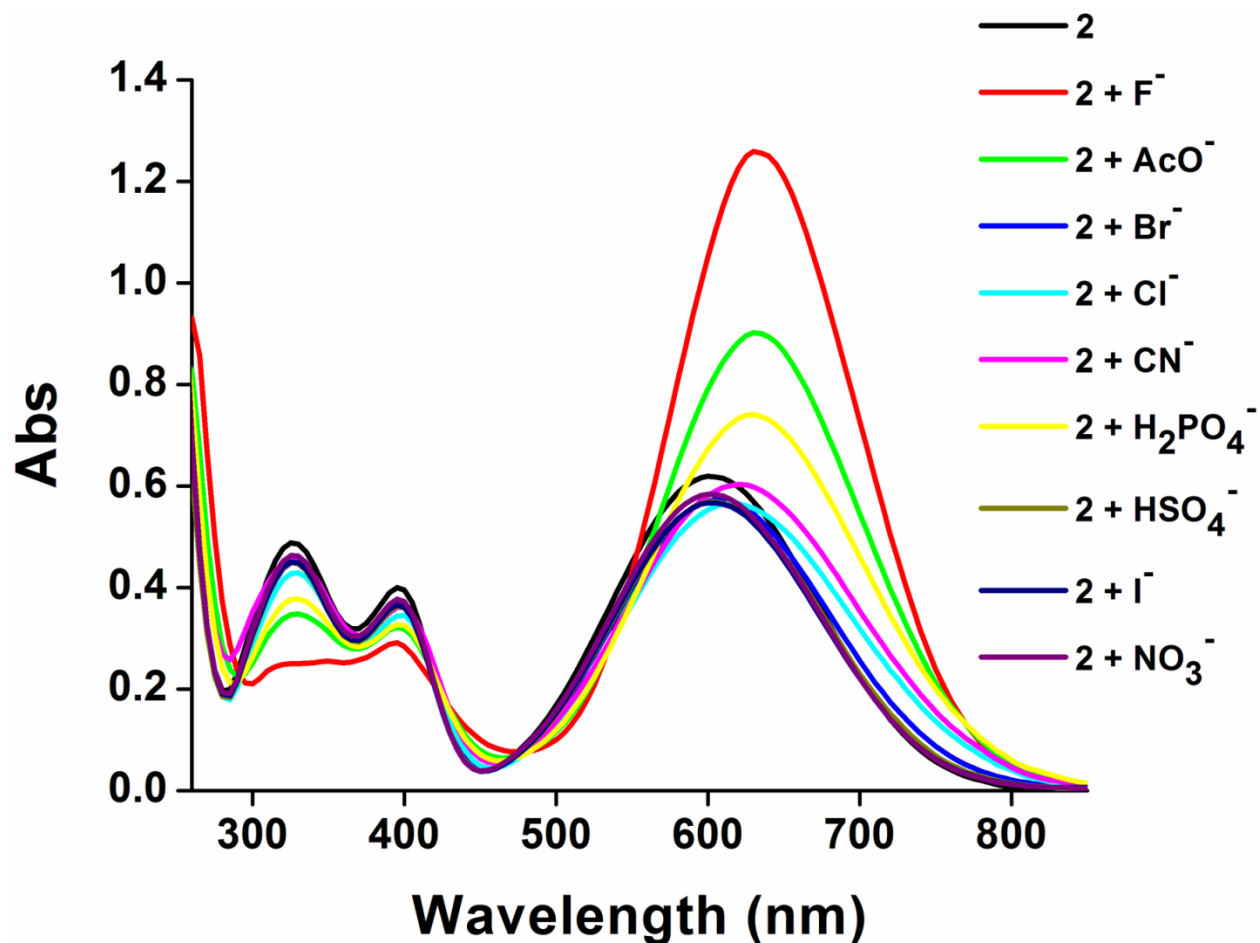

**Figure S8** UV-vis absorption spectra of **4** ( $5.0 \times 10^{-5}$  M) in DCM solution in the presence of different anions ( $5.0 \times 10^{-4}$  M) as their TBA salts

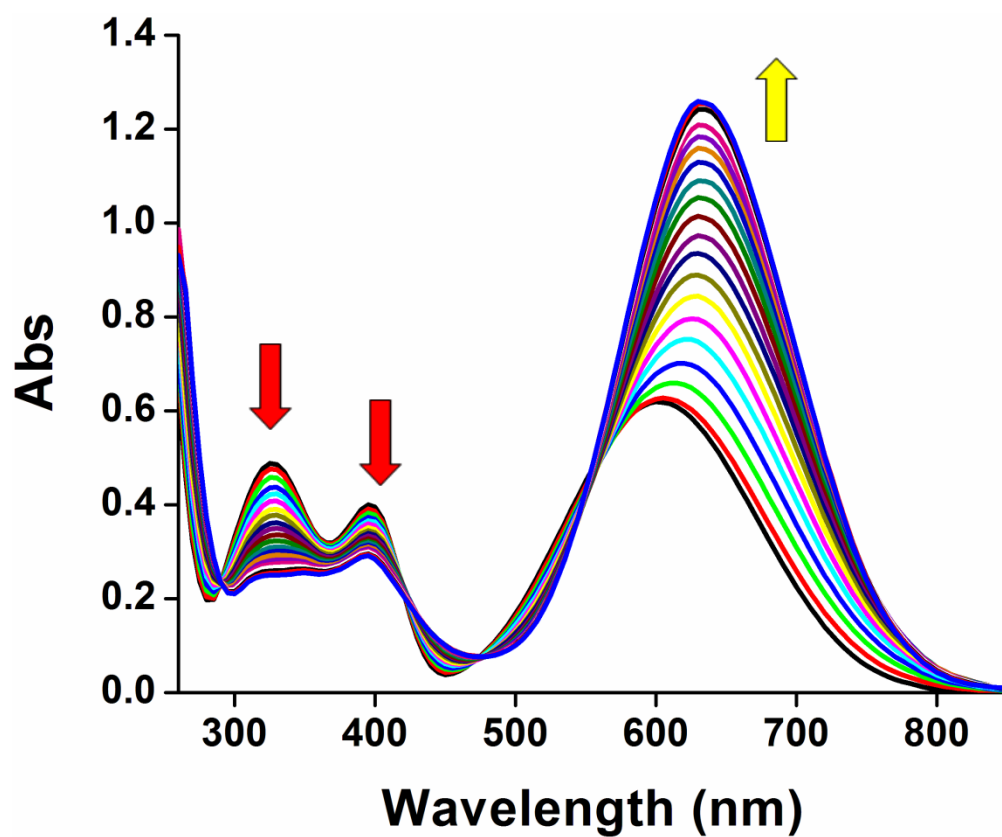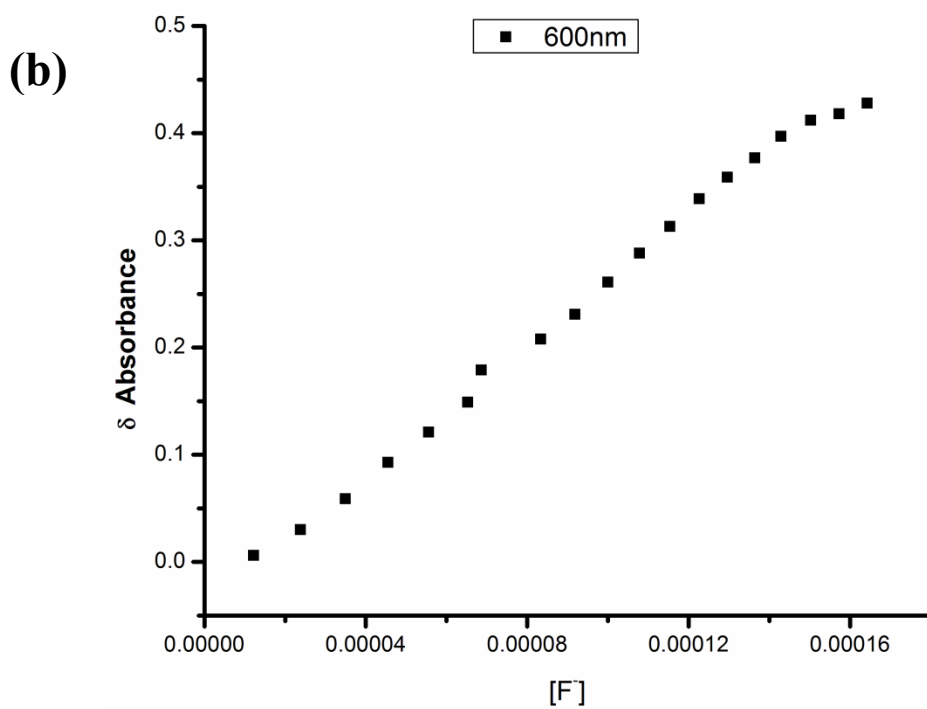

**Figure S9** (a) Absorption spectroscopic titrations of compound 4 ( $5 \times 10^{-5}$  M) in DCM solution with TBAF ( $5 \times 10^{-4}$  M); (b) Titration profile of the observed changes at  $\lambda = 600$  nm.

Supporting information for publication

1) 4 / AcO<sup>-</sup>

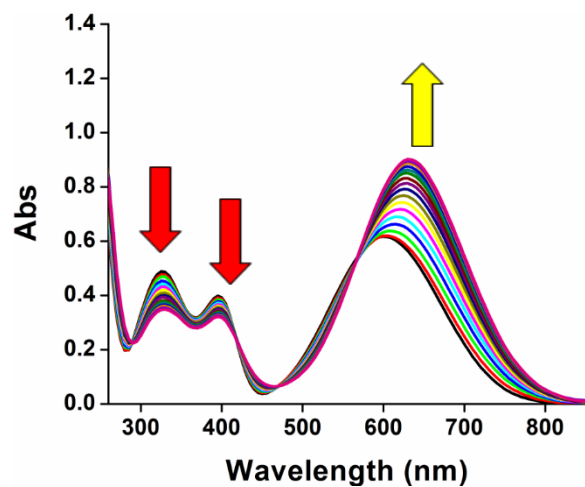

2) 4 / H<sub>2</sub>PO<sub>4</sub><sup>-</sup>

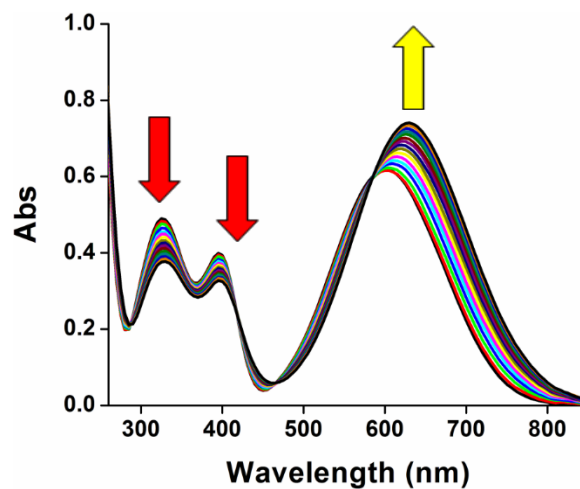

3) 4 / Cl<sup>-</sup>

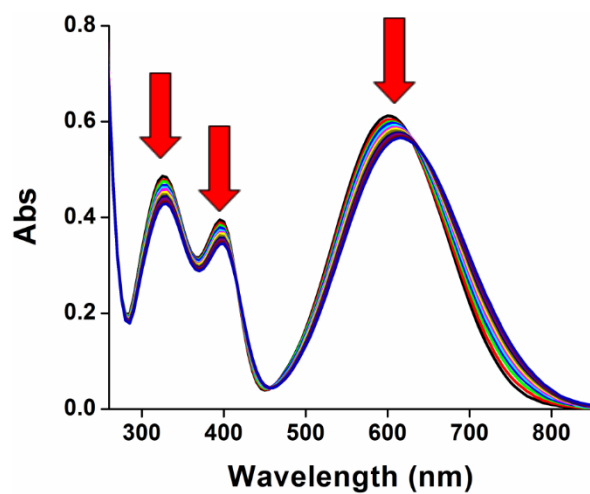

4) 4 / CN<sup>-</sup>

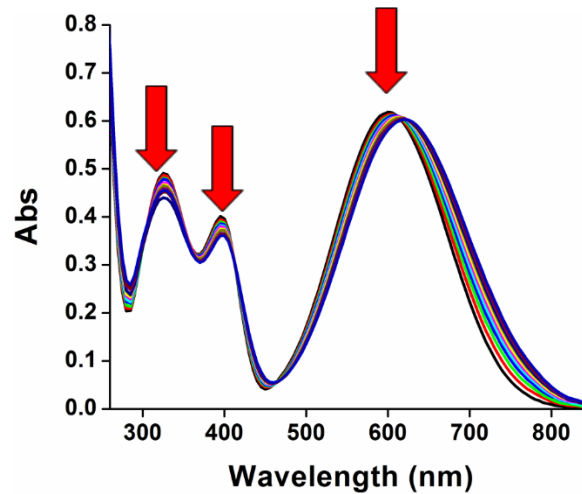

Supporting information for publication

5) 4 / Br<sup>-</sup>

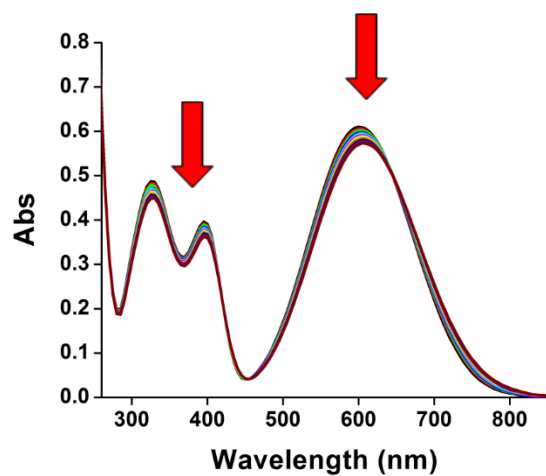

6) 4 / I<sup>-</sup>

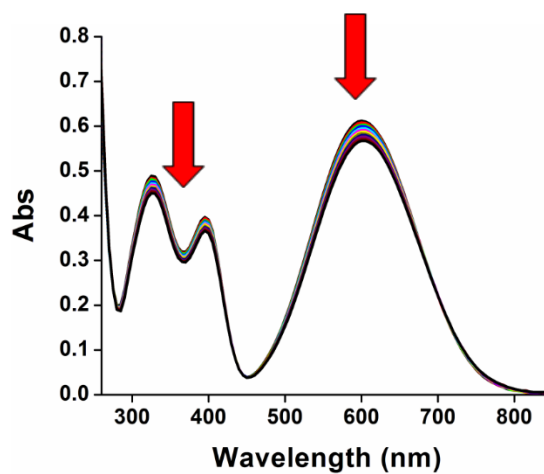

7) 4 / HSO<sub>4</sub><sup>-</sup>

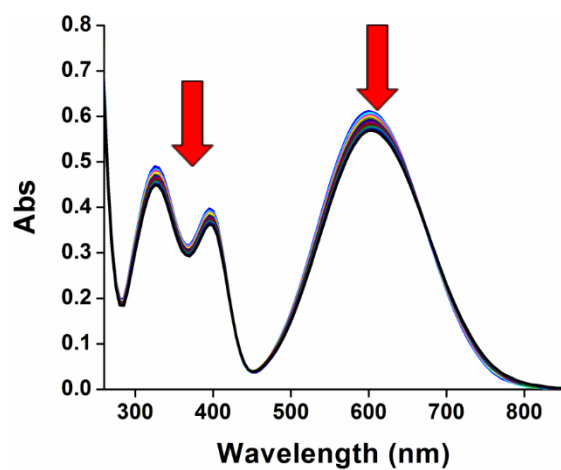

8) 4 / NO<sub>3</sub><sup>-</sup>

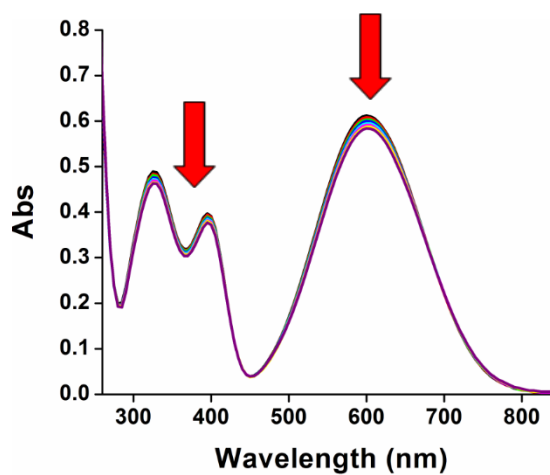

**Figure S10** Absorption spectroscopic titrations of compound 4 ( $5 \times 10^{-5}$  M) in DCM solution with different anions ( $5 \times 10^{-4}$  M).

## Supporting information for publication

### Computational Results:

*Method:* B3LYP (The default grid size for B3LYP method in Gaussian 09 is used)

*Basis set:* 6-311++G(d,p)

*Program:* Gaussian 09, Revision D.01;

The default parameters for geometry optimization and NBO analysis are used in all the calculation.<sup>2,3</sup>

### Optimized structure of PCP 1

The optimized structure of **PCP 1** is shown in Figure S11. In particular, the PTZ-skeleton takes a butterfly-like conformation between the two benzene rings with an angle of  $139.28^\circ$ .

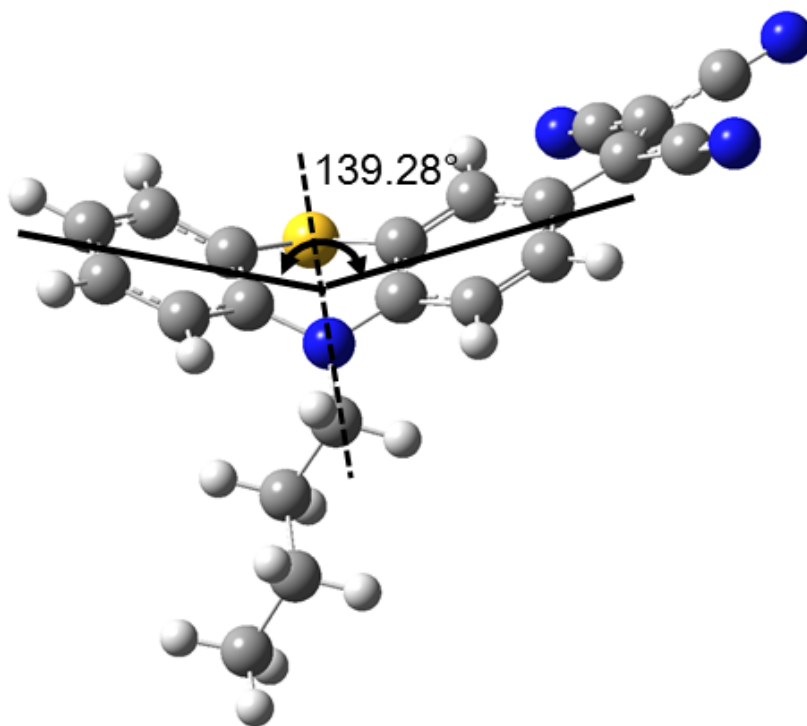

**Figure S11** The optimized structure of **PCP 1**

## Supporting information for publication

### Charge distribution calculations

The calculated natural atomic charge distribution on **PCP 1** is shown in Table S1, Table S2 and Figure S12. In general, the electron density on the benzene rings is strongly affected by the adjacent functional groups. –CN groups and –N– are common electron-withdrawing groups while –S– is the electron-donating group. From the table S1, one can compare the charge distribution at the carbon and hydrogen atoms on the left and right benzene ring of **PCP 1**. We could find that:

- The Right benzene ring has one H atom less than the Left one.
- The charge distribution on each H atom is more or less the same (around 0.21~0.22). Therefore, C atoms contribute most to the difference.
- The Left ring has one positively charged carbon atom (C9a, charge = + 0.142).
- Even though atoms (C6, C7, C8) at left are a bit negative than atoms (C4, C3, C2) at right, the carbon atoms at left (C5a, C9, C9a) are significantly less negative than carbon atoms at right (C4a, C1, C10a). As a result, the benzene ring at the left side contains more positive charge than that of the right side.

**Table S1** Rational charge distribution at left and right benzene rings in **PCP 1**

| Left | C            | H     |  | Right | C      | H     |
|------|--------------|-------|--|-------|--------|-------|
| 5a   | -0.199       | –     |  | 4a    | -0.342 | –     |
| 6    | -0.195       | 0.218 |  | 4     | -0.184 | 0.232 |
| 7    | -0.202       | 0.212 |  | 3     | -0.177 | –     |
| 8    | -0.189       | 0.210 |  | 2     | -0.150 | 0.224 |
| 9    | -0.229       | 0.210 |  | 1     | -0.416 | 0.195 |
| 9a   | <b>0.142</b> | –     |  | 10a   | -0.285 | –     |
| Sum  | -0.872       | 0.850 |  | Sum   | -1.554 | 0.419 |

**Table S2** Charge distribution on vinyl and N-containing butyl chain in **PCP 1**

| Carbon Number | Charge density |
|---------------|----------------|
| <b>C3'</b>    | <b>-0.011</b>  |
| C4'           | -0.249         |
| C1'           | -0.178         |
| C2'           | -0.392         |
| C3''          | -0.381         |
| C4''          | -0.569         |



Supporting information for publication

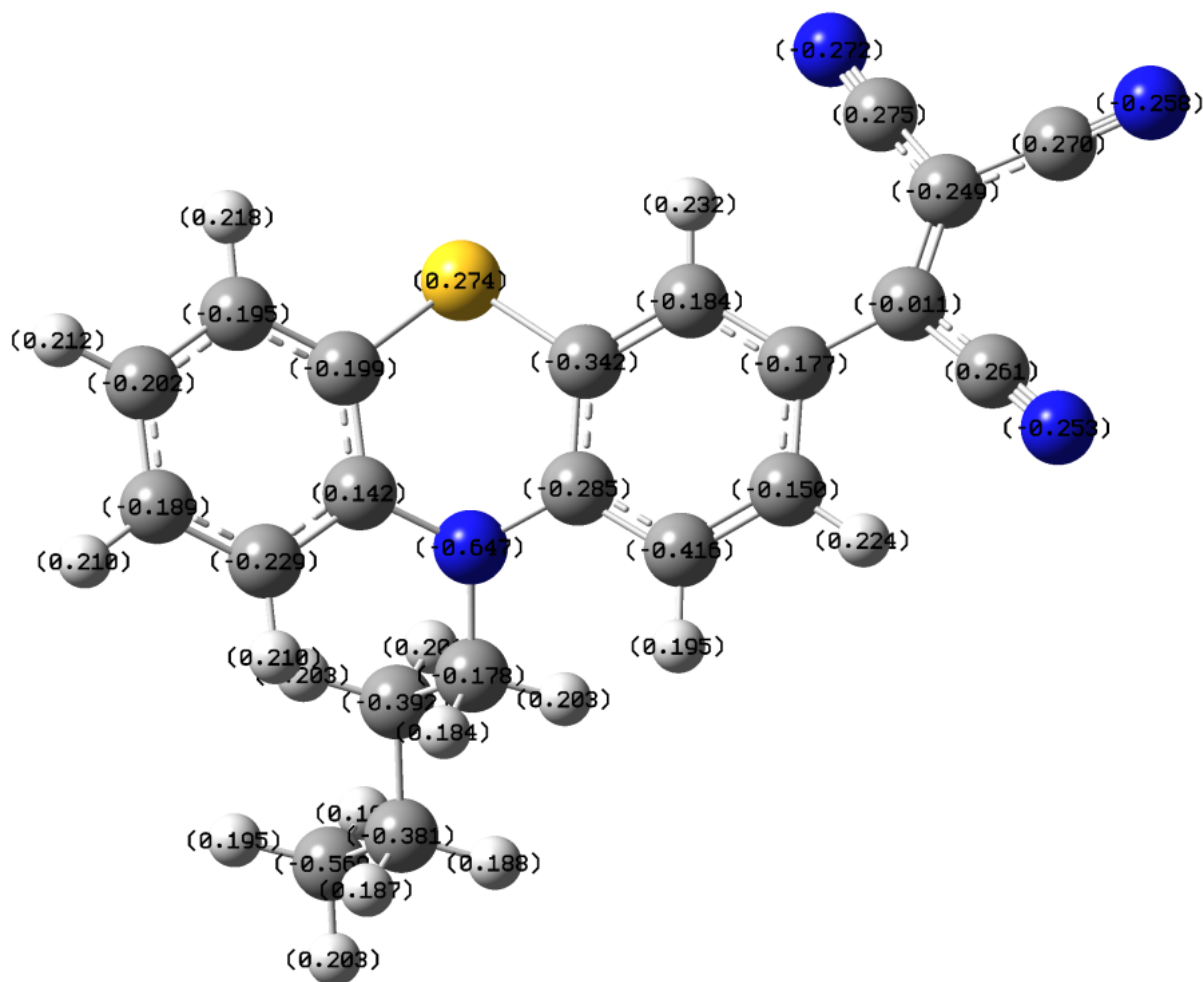

**Figure S12** The calculated natural atomic charge distribution on **PCP 1**

## Supporting information for publication

The electronic potential (EP) distribution on the molecule surface contours the nucleophilic and the electrophilic parts of **REA**. The red and yellow regions of the molecular surface are rich in electron density, while the blue and cyan regions are electron deficient. As shown in the Figure S13, the electron density mainly focuses on the three  $\text{-CN}$  groups while the hydrogen atoms carry positive charge. It's also noticeable that the region close to the benzene  $\pi$  orbital is nucleophilic, which means abundant distribution of electrons. However, for the benzene ring conjugated to the electron-withdrawing  $\text{-CN}$  groups, the electron density near the  $\pi$  orbital is greatly reduced. Of the conjugate structure of the three  $\text{-CN}$  groups, vinyl group and the phenyl group, only the vinyl group provides evident electrophilic region.

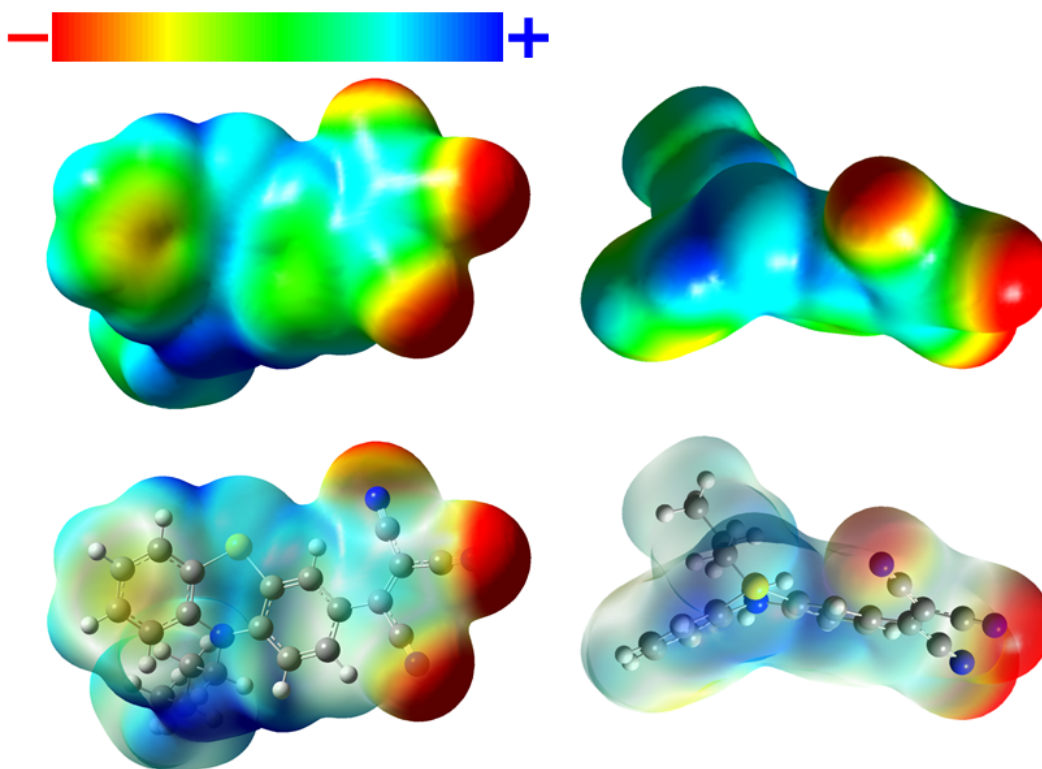

**Figure S13** The opaque surface shows the regions with different charge, while the transparent surface shows the groups inside.

## Supporting information for publication

Total energy of PCP 1: -1427.28480399 a.u.

### Cartesian coordinates for PCP 1

| Center<br>Number | Atomic<br>Number | Atomic<br>Type | Coordinates (Angstroms) |           |           |
|------------------|------------------|----------------|-------------------------|-----------|-----------|
|                  |                  |                | X                       | Y         | Z         |
| 1                | 6                | 0              | 4.352366                | 2.056064  | -1.549902 |
| 2                | 6                | 0              | 3.711407                | 0.844834  | -1.300358 |
| 3                | 6                | 0              | 2.544218                | 0.799959  | -0.528298 |
| 4                | 6                | 0              | 2.021027                | 2.006554  | -0.038891 |
| 5                | 6                | 0              | 2.647365                | 3.219684  | -0.317214 |
| 6                | 6                | 0              | 3.825773                | 3.247013  | -1.058634 |
| 7                | 6                | 0              | -0.268278               | 0.618320  | 0.205224  |
| 8                | 6                | 0              | 0.487043                | -0.470232 | -0.294971 |
| 9                | 6                | 0              | -0.223504               | -1.563191 | -0.825683 |
| 10               | 1                | 0              | 0.307879                | -2.396569 | -1.263610 |
| 11               | 6                | 0              | -1.605756               | -1.584387 | -0.830594 |
| 12               | 6                | 0              | -2.359753               | -0.513402 | -0.311232 |
| 13               | 6                | 0              | -1.651166               | 0.602179  | 0.182483  |
| 14               | 1                | 0              | 5.260662                | 2.063224  | -2.140997 |
| 15               | 1                | 0              | 4.128232                | -0.065900 | -1.708860 |
| 16               | 1                | 0              | 2.212390                | 4.138729  | 0.058026  |
| 17               | 1                | 0              | 4.319228                | 4.190906  | -1.256298 |
| 18               | 1                | 0              | -2.110236               | -2.443242 | -1.255253 |
| 19               | 1                | 0              | -2.173648               | 1.470630  | 0.556110  |
| 20               | 6                | 0              | 2.654756                | -1.679356 | -0.287289 |
| 21               | 1                | 0              | 3.070623                | -1.864798 | -1.285789 |
| 22               | 1                | 0              | 1.960459                | -2.492220 | -0.083030 |
| 23               | 6                | 0              | 3.755619                | -1.720045 | 0.780093  |
| 24               | 1                | 0              | 4.450094                | -0.886105 | 0.646746  |
| 25               | 1                | 0              | 3.289186                | -1.582150 | 1.761451  |
| 26               | 6                | 0              | 4.531746                | -3.042233 | 0.750130  |
| 27               | 1                | 0              | 4.992900                | -3.172363 | -0.236528 |
| 28               | 1                | 0              | 3.833733                | -3.879286 | 0.873363  |
| 29               | 6                | 0              | 5.612886                | -3.120066 | 1.831735  |
| 30               | 1                | 0              | 6.150108                | -4.070779 | 1.786175  |
| 31               | 1                | 0              | 6.347099                | -2.316930 | 1.716950  |
| 32               | 1                | 0              | 5.178304                | -3.031013 | 2.831815  |
| 33               | 6                | 0              | -3.816962               | -0.589657 | -0.329348 |
| 34               | 6                | 0              | -4.721375               | 0.135926  | 0.422093  |
| 35               | 6                | 0              | -4.382616               | -1.548481 | -1.236234 |
| 36               | 7                | 0              | -4.807464               | -2.328944 | -1.973905 |
| 37               | 6                | 0              | -6.128661               | -0.024639 | 0.246813  |
| 38               | 7                | 0              | -7.273587               | -0.130973 | 0.128756  |
| 39               | 6                | 0              | -4.357018               | 1.058189  | 1.444780  |
| 40               | 7                | 0              | -4.109136               | 1.806995  | 2.290410  |
| 41               | 16               | 0              | 0.574090                | 1.969518  | 0.998149  |
| 42               | 7                | 0              | 1.879163                | -0.428883 | -0.259384 |

**Table S3**

## Supporting information for publication

Total energy of PCP 1-CN<sup>-</sup> adduct: **-1520.23240702 a.u.**

### Cartesian coordinates for PCP 1-CN<sup>-</sup> adduct

| Center<br>Number | Atomic<br>Number | Atomic<br>Type | Coordinates (Angstroms) |           |           |
|------------------|------------------|----------------|-------------------------|-----------|-----------|
|                  |                  |                | X                       | Y         | Z         |
| 1                | 6                | 0              | 4.642304                | -2.353709 | 0.927722  |
| 2                | 6                | 0              | 3.972725                | -1.132397 | 0.988598  |
| 3                | 6                | 0              | 2.789026                | -0.924457 | 0.266816  |
| 4                | 6                | 0              | 2.281703                | -1.990884 | -0.500916 |
| 5                | 6                | 0              | 2.936152                | -3.220271 | -0.528212 |
| 6                | 6                | 0              | 4.128789                | -3.402847 | 0.170778  |
| 7                | 6                | 0              | -0.052135               | -0.659875 | -0.362424 |
| 8                | 6                | 0              | 0.679675                | 0.260844  | 0.407939  |
| 9                | 6                | 0              | -0.029150               | 1.095421  | 1.273864  |
| 10               | 1                | 0              | 0.495572                | 1.791763  | 1.914939  |
| 11               | 6                | 0              | -1.422791               | 1.052492  | 1.331935  |
| 12               | 6                | 0              | -2.136831               | 0.153066  | 0.551095  |
| 13               | 6                | 0              | -1.436042               | -0.719690 | -0.284853 |
| 14               | 1                | 0              | 5.561946                | -2.483258 | 1.487827  |
| 15               | 1                | 0              | 4.377973                | -0.337426 | 1.601135  |
| 16               | 1                | 0              | 2.511173                | -4.030065 | -1.110542 |
| 17               | 1                | 0              | 4.641813                | -4.356699 | 0.128815  |
| 18               | 1                | 0              | -1.942551               | 1.729666  | 1.997987  |
| 19               | 1                | 0              | -1.978475               | -1.428916 | -0.898759 |
| 20               | 6                | 0              | 2.804516                | 1.528459  | 0.652512  |
| 21               | 1                | 0              | 3.200550                | 1.480358  | 1.678598  |
| 22               | 1                | 0              | 2.071478                | 2.334219  | 0.642485  |
| 23               | 6                | 0              | 3.919840                | 1.892984  | -0.336466 |
| 24               | 1                | 0              | 4.642678                | 1.075641  | -0.416095 |
| 25               | 1                | 0              | 3.470900                | 2.008763  | -1.328562 |
| 26               | 6                | 0              | 4.646894                | 3.181739  | 0.063170  |
| 27               | 1                | 0              | 5.087576                | 3.058735  | 1.060591  |
| 28               | 1                | 0              | 3.920295                | 3.998759  | 0.150120  |
| 29               | 6                | 0              | 5.742339                | 3.581584  | -0.929938 |
| 30               | 1                | 0              | 6.244729                | 4.502748  | -0.620737 |
| 31               | 1                | 0              | 6.502979                | 2.799008  | -1.015672 |
| 32               | 1                | 0              | 5.326566                | 3.748057  | -1.928335 |
| 33               | 6                | 0              | -4.075341               | -1.296216 | 0.908874  |
| 34               | 7                | 0              | -4.343646               | -2.380942 | 1.193154  |
| 35               | 16               | 0              | 0.831278                | -1.717531 | -1.497748 |
| 36               | 7                | 0              | 2.094107                | 0.303873  | 0.284513  |
| 37               | 6                | 0              | -3.684043               | 0.089963  | 0.549722  |
| 38               | 6                | 0              | -4.232018               | 0.975993  | 1.617188  |
| 39               | 7                | 0              | -4.676270               | 1.695271  | 2.403678  |
| 40               | 6                | 0              | -4.253475               | 0.467728  | -0.824103 |
| 41               | 6                | 0              | -3.587445               | 1.439848  | -1.577882 |
| 42               | 7                | 0              | -3.013675               | 2.237974  | -2.207997 |
| 43               | 6                | 0              | -5.549661               | 0.070733  | -1.172567 |
| 44               | 7                | 0              | -6.624207               | -0.278164 | -1.464340 |

**Table S4**

Supporting information for publication

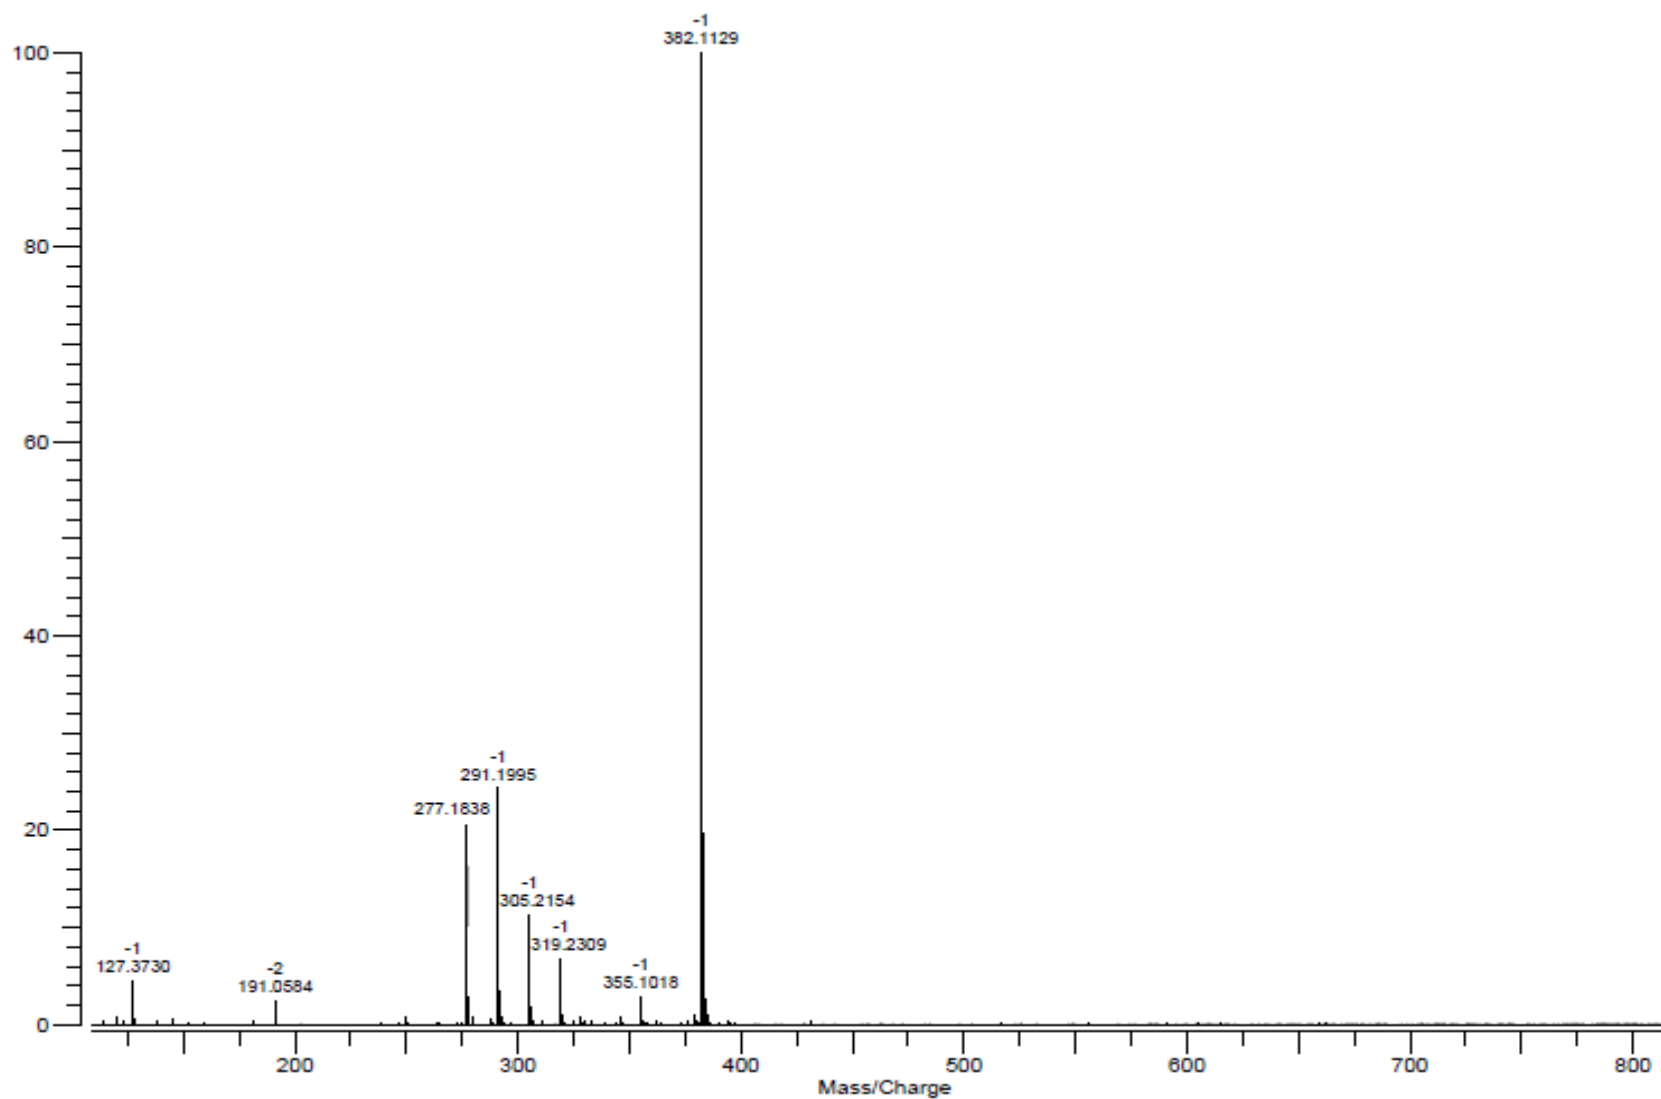

Fig

**Figure S14** The high resolution negative ion ESI-MS spectrum of product obtained by mixing acetonitrile solution of **PCP 1** and TBACN ( $1 \times 10^{-5}$  M each) after 5 min of incubation at room temperature.

Supporting information for publication

1) PCP 1 / F<sup>-</sup>

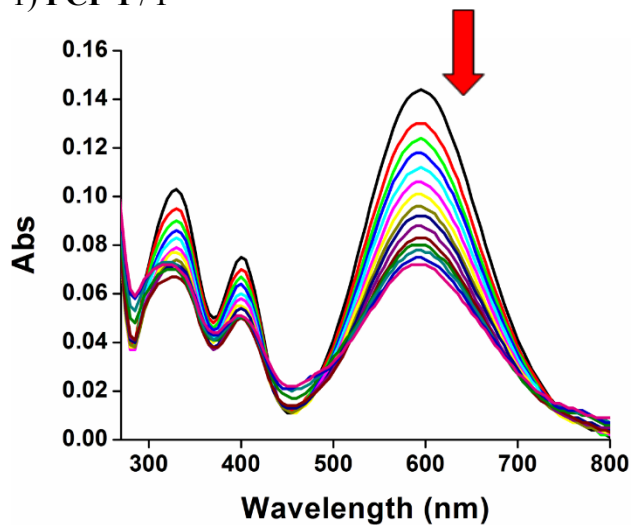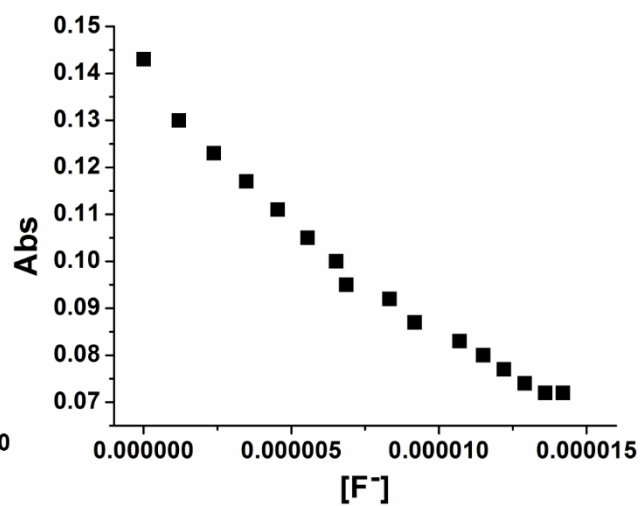

2) PCP 1 / AcO<sup>-</sup>

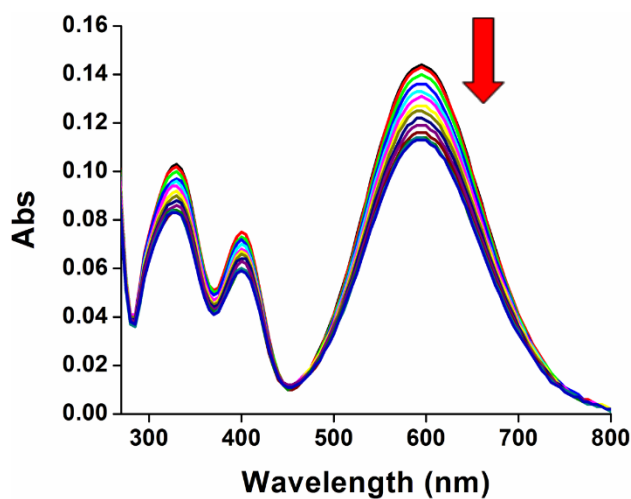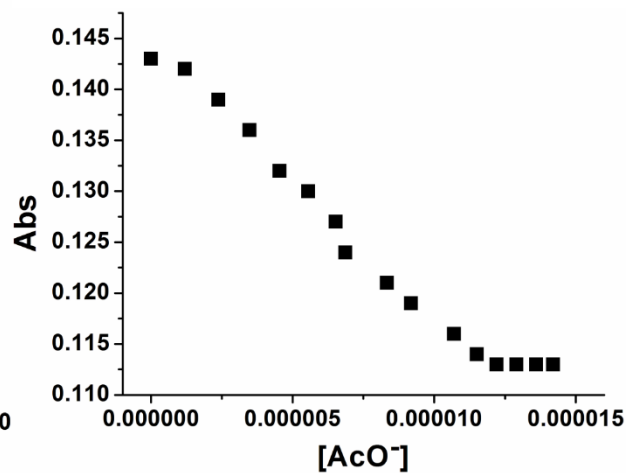

3) PCP 1 / H<sub>2</sub>PO<sub>4</sub><sup>-</sup>

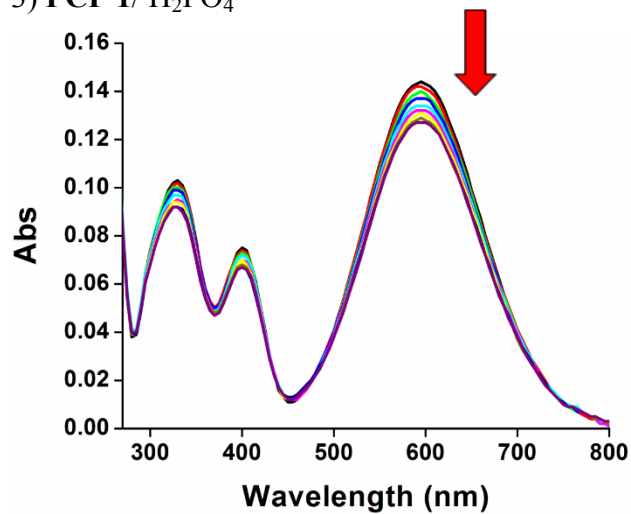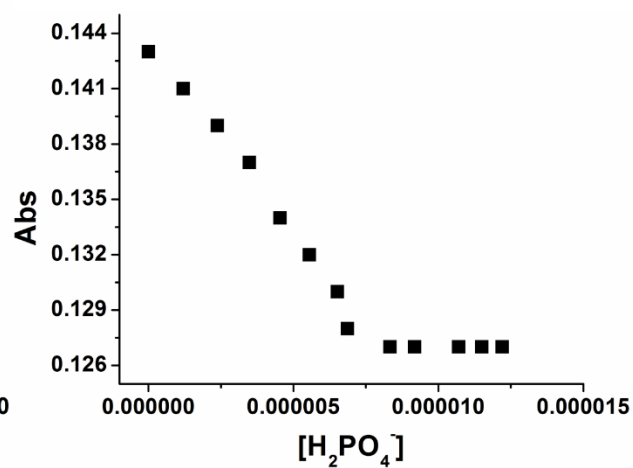

### Supporting information for publication

4) PCP 1/ Cl<sup>-</sup>

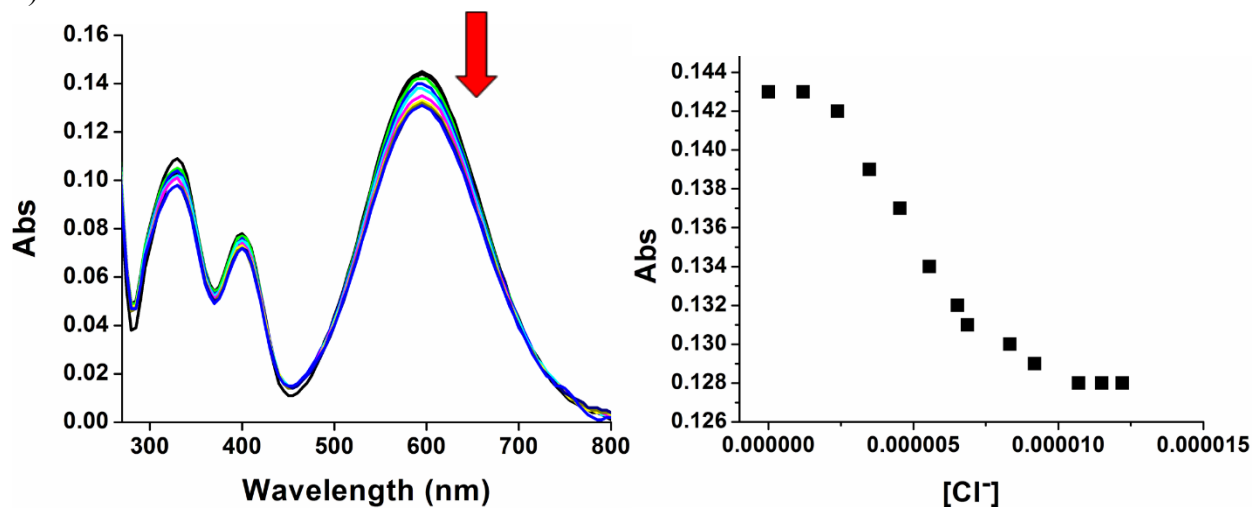

5) PCP 1/ Br<sup>-</sup>

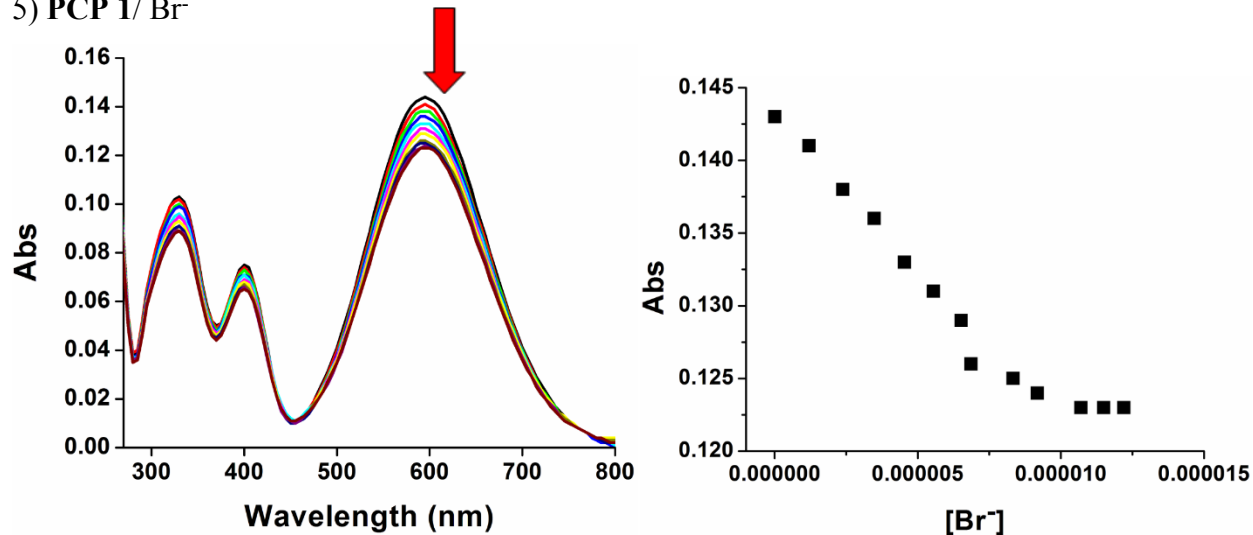

6) PCP 1/ I<sup>-</sup>

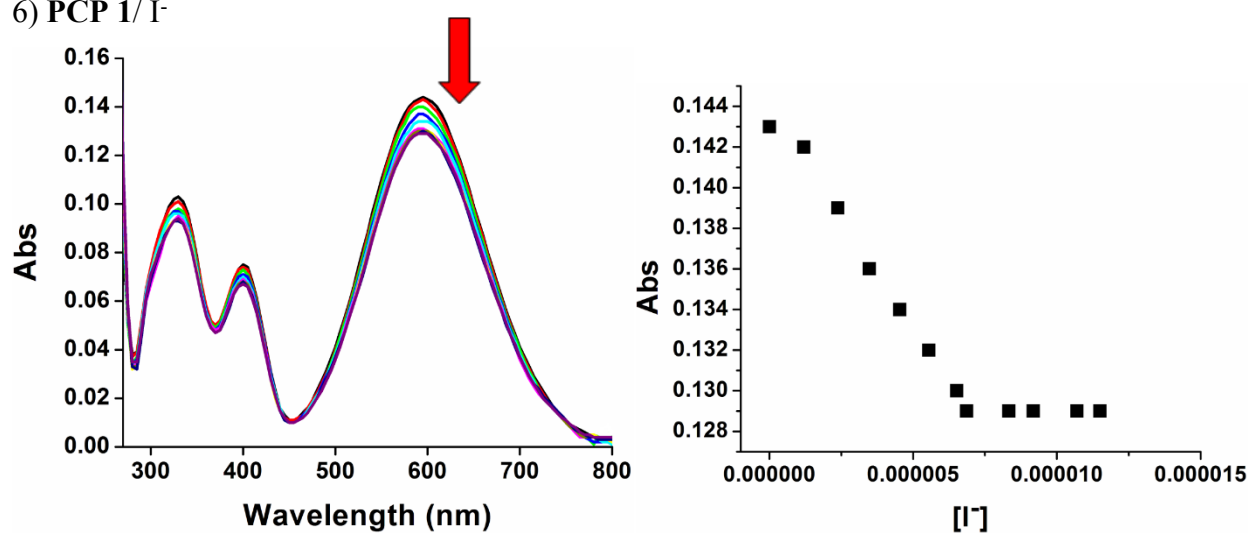

## Supporting information for publication

### 7) PCP 1/NO<sub>3</sub><sup>-</sup>

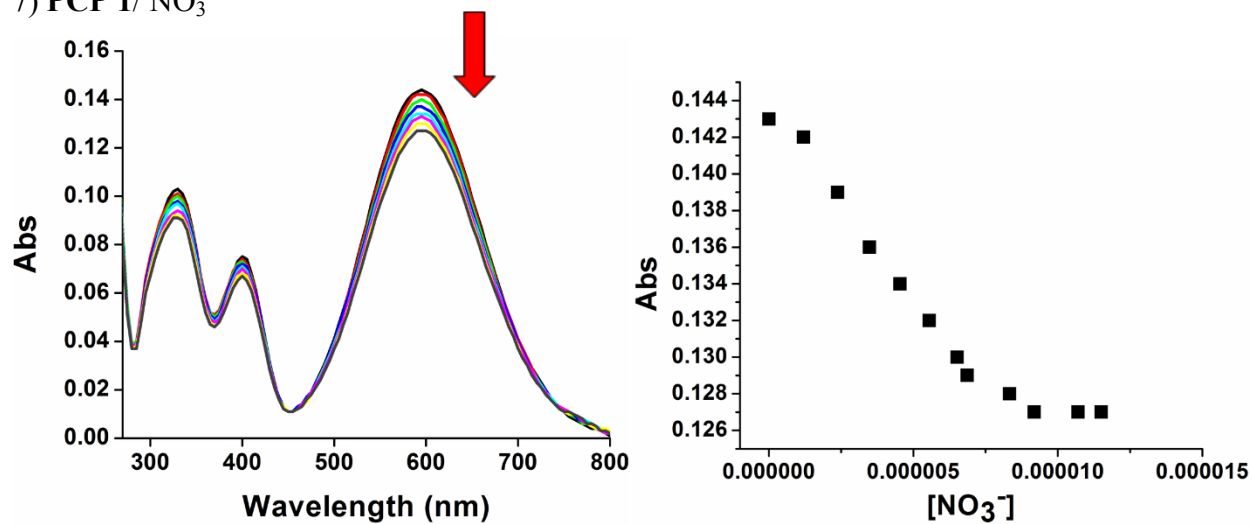

### 8) PCP 1/HSO<sub>4</sub><sup>-</sup>

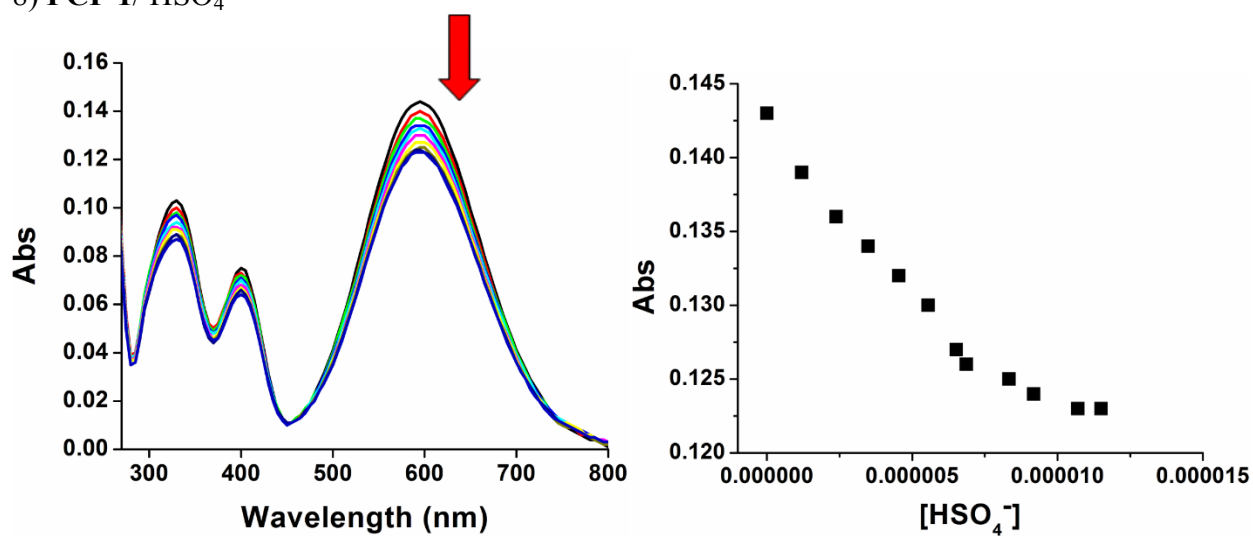

**Figure S15** Absorption spectroscopic titrations of PCP 1 ( $5 \times 10^{-6}$  M) in DCM solution with different anions ( $5 \times 10^{-5}$  M) and titrations profile of the observed changes at ( $\lambda = 600$  nm)



Supporting information for publication

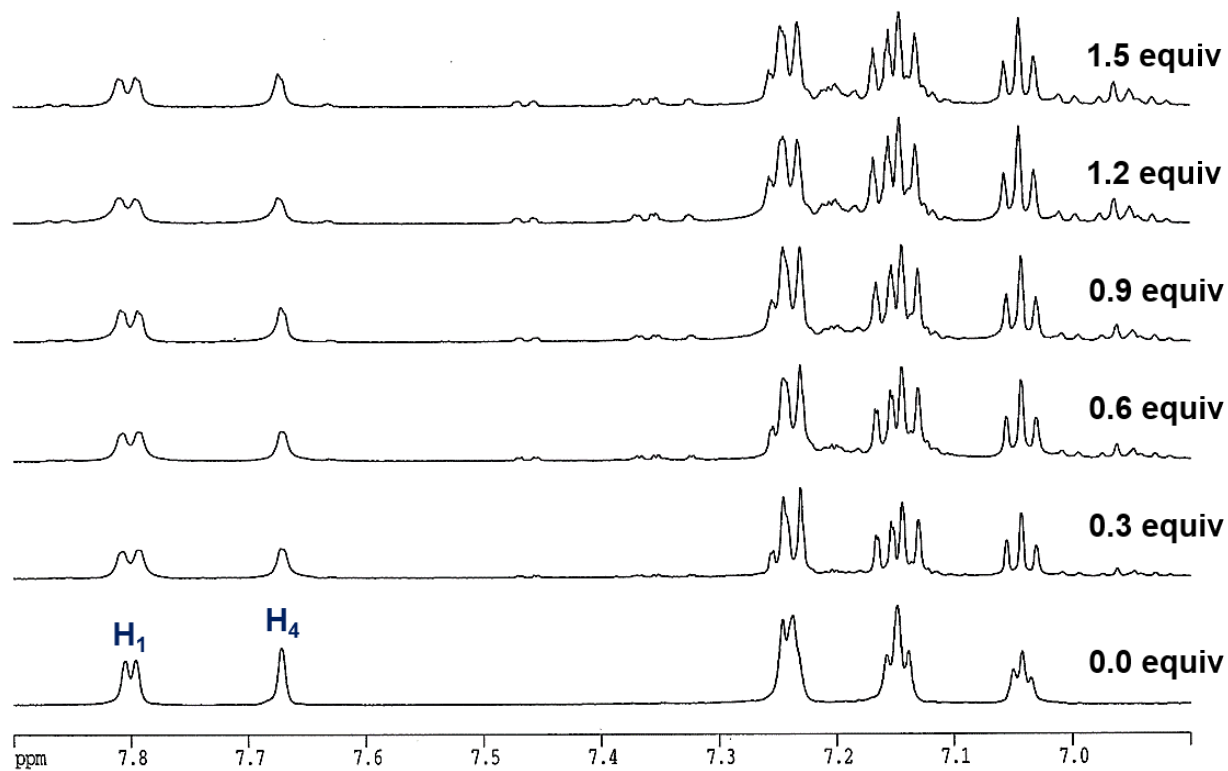

**Figure S16** Partial <sup>1</sup>H NMR (600 MHz, (CD<sub>3</sub>)<sub>2</sub>SO) spectral changes seen upon the addition of 0-1.5 equiv of F<sup>-</sup> (as tetrabutylammonium salt) to **PCP 1** (10.0 mM).

## Supporting information for publication

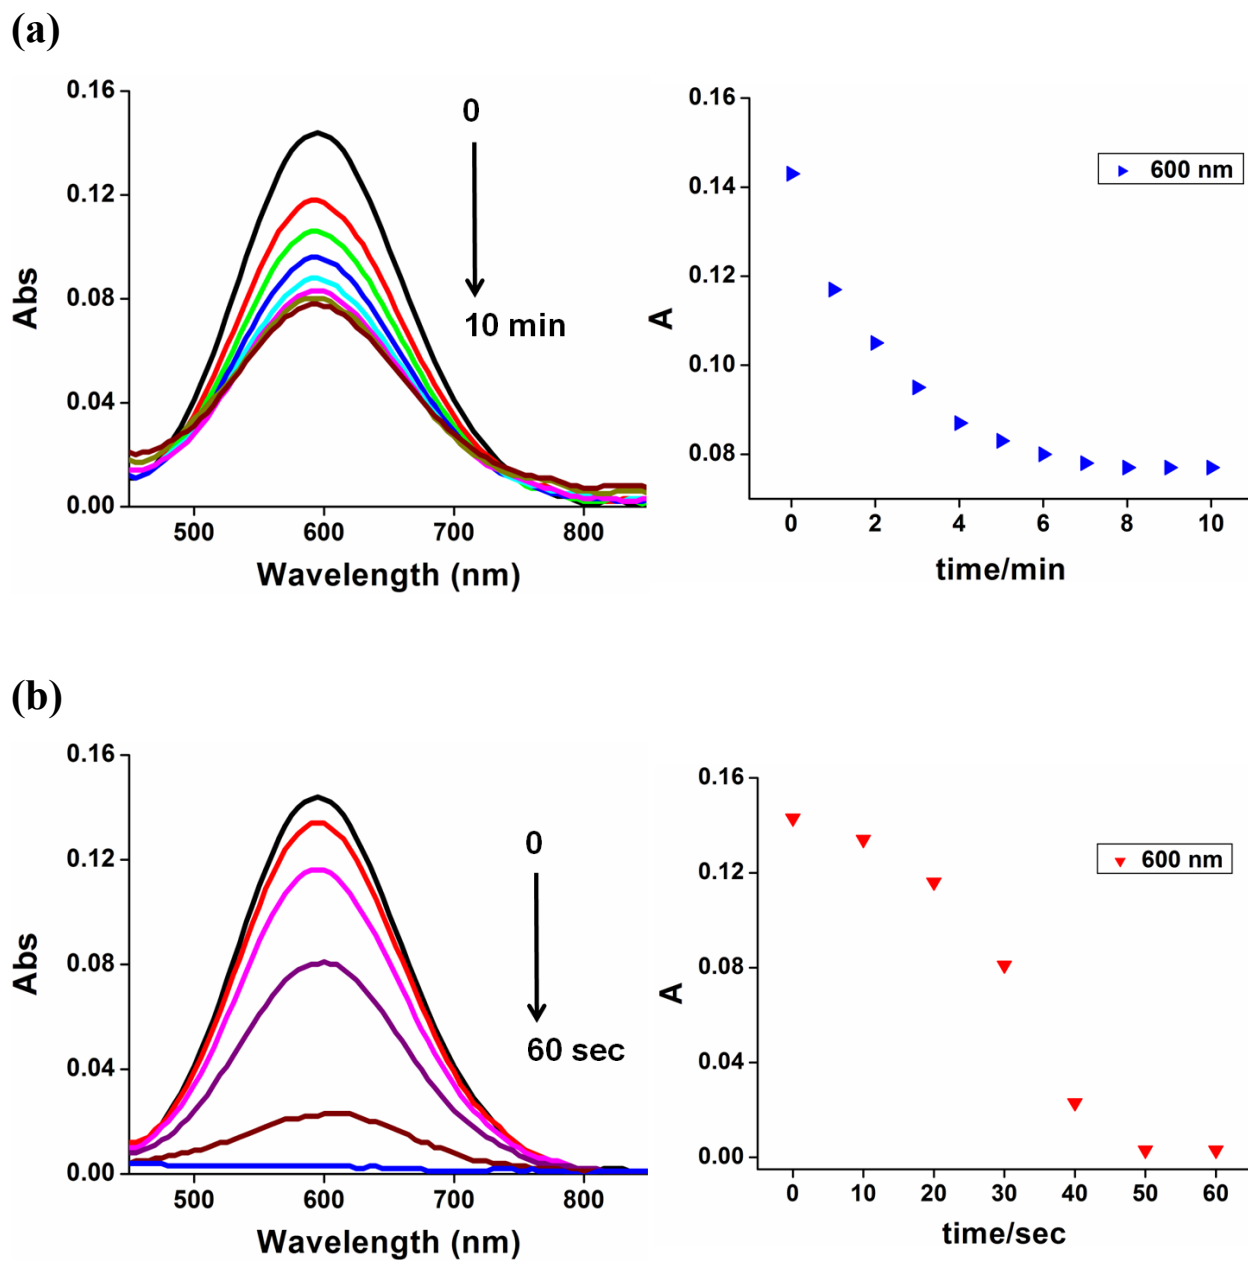

**Figure S17** Time-dependent absorption spectral changes (top) and time-dependent absorption intensity changes at  $\lambda = 600$  nm (bottom) of **PCP 1** ( $5.0 \times 10^{-6}$  M) in the absence or presence of 5 equiv (a) TBAF ( $5.0 \times 10^{-5}$  M) and (b) TBACN ( $5.0 \times 10^{-5}$  M) in DCM solution.

## Supporting information for publication

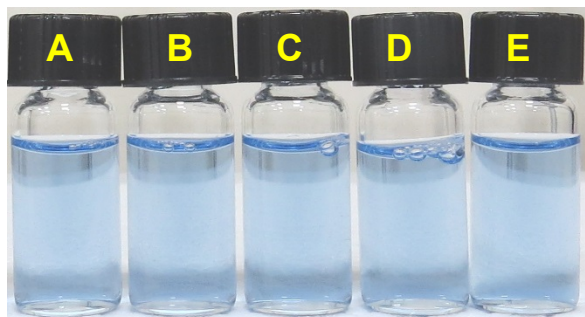

**Figure S18** Colour responses of **PCP 1** (A; 1  $\mu\text{M}$ ) in Triton X-100-water solution in the presence of 1  $\mu\text{M}$  (B), 1.5  $\mu\text{M}$  (C), 2.5  $\mu\text{M}$  (D), and 5  $\mu\text{M}$  (E) of NaF after 10 min of incubation.

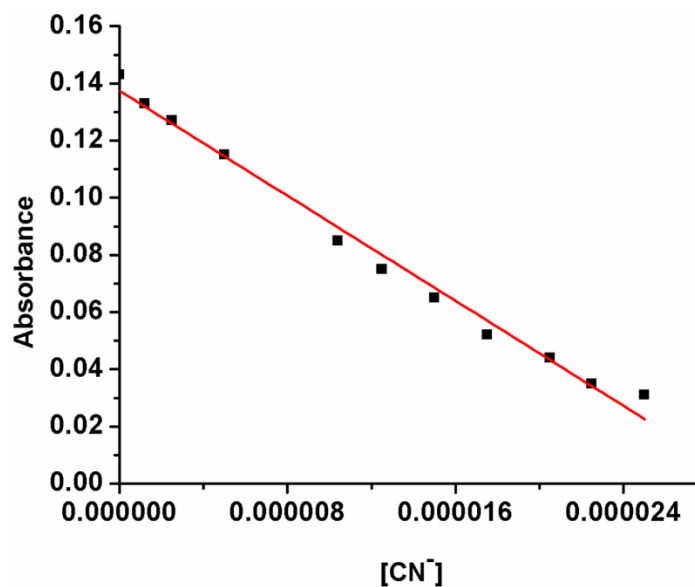

**Figure S19** Changes in the absorbance at 600 nm in micellar solutions of **PCP 1** ( $2 \times 10^{-5}$  M) *versus* increasing quantities of  $\text{CN}^-$ .

## Supporting information for publication

### References

1. B. P. Bespalov, *Khim. Geterotsykl. Soedin.*, 1985, 326-330.
2. M. J. Frisch, G. W. Trucks, H. B. Schlegel, G. E. Scuseria, M. A. Robb, J. R. Cheeseman, G. Scalmani, V. Barone, B. Mennucci, G. A. Petersson, H. Nakatsuji, M. Caricato, X. Li, H. P. Hratchian, A. F. Izmaylov, J. Bloino, G. Zheng, J. L. Sonnenberg, M. Hada, M. Ehara, K. Toyota, R. Fukuda, J. Hasegawa, M. Ishida, T. Nakajima, Y. Honda, O. Kitao, H. Nakai, T. Vreven, J. A. Montgomery, Jr., J. E. Peralta, F. Ogliaro, M. Bearpark, J. J. Heyd, E. Brothers, K. N. Kudin, V. N. Staroverov, R. Kobayashi, J. Normand, K. Raghavachari, A. Rendell, J. C. Burant, S. S. Iyengar, J. Tomasi, M. Cossi, N. Rega, J. M. Millam, M. Klene, J. E. Knox, J. B. Cross, V. Bakken, C. Adamo, J. Jaramillo, R. Gomperts, R. E. Stratmann, O. Yazyev, A. J. Austin, R. Cammi, C. Pomelli, J. W. Ochterski, R. L. Martin, K. Morokuma, V. G. Zakrzewski, G. A. Voth, P. Salvador, J. J. Dannenberg, S. Dapprich, A. D. Daniels, Ö. Farkas, J. B. Foresman, J. V. Ortiz, J. Cioslowski, and D. J. Fox, *Gaussian 09*, Revision D.01, Gaussian, Inc., Wallingford CT, 2009.
3. NBO Version 3.1, E. D. Glendening, A. E. Reed, J. E. Carpenter, and F. Weinhold.
